# Supplementary material for: Medial knee joint contact force in the intact limb during walking in recently ambulatory service members with unilateral limb loss: a cross-sectional study
Source: PeerJ. 2017 Feb 2;5:e2960. doi: 10.7717/peerj.2960 (PMC5292027; doi:10.7717/peerj.2960)
Supplement: Data S1 [file peerj-05-2960-s001.xlsx]

## Sheet: Descriptors & Outcomes
Subject	m (kg)	Ht (m)	v (m/s)	T (s)	Peak (%BW)	Imp (%BW•s)	LR (%BW/s)		Notes
Con 1	78.3	1.79	1.34	1.057	1.303	0.528	14.73		"m" is total body mass including the prosthesis for TTA and TFA
Con 2	94.8	1.72	1.25	1.103	1.573	0.672	19.37		"v" is average walking speed
Con 3	76.8	1.76	1.29	1.083	1.269	0.541	17.89		"T" is average stride duration
Con 4	80.8	1.73	1.32	1.096	1.631	0.6	20.07		"Peak" is peak medial knee contact force in % body weight (BW)
Con 5	116.3	1.86	1.08	1.252	1.765	0.737	16.45		"Imp" is impulse of the medial knee contact force
Con 6	76.1	1.76	1.4	1.111	1.386	0.504	18.96		"LR" is maximum loading rate of the medial knee contact force in early stance
Con 7	68.3	1.72	1.42	1.002	1.837	0.58	24.26		"Con" is control subjects
Con 8	72.5	1.77	1.28	1.192	1.755	0.874	21.13		"TTA" is transtibial subjects
Con 9	79.5	1.84	1.39	1.166	1.241	0.52	20.45		"TFA" is transfemoral subjects
Con 10	94.8	1.92	1.32	1.133	1.966	0.816	25.2
TTA 1	85.3	1.78	1.482	1.048	2.266	0.727	33.57
TTA 2	104.5	1.85	1.336	1.145	1.714	0.647	23.16
TTA 3	63.4	1.73	1.286	1.167	2.174	0.857	25.59
TTA 4	61.6	1.73	0.992	1.204	1.435	0.623	19.01
TTA 5	90.6	1.78	1.217	1.141	1.72	0.696	25.88
TFA 1	93.1	1.96	1.374	1.288	2.169	0.946	24.7
TFA 2	85.7	1.69	0.885	1.256	2.216	0.704	29.86
TFA 3	67.7	1.71	1.25	1.133	1.721	0.735	26.79
TFA 4	103.6	1.74	1.235	1.128	1.874	0.728	24.19
TFA 5	68.1	1.75	1.45	1.08	1.149	0.517	14.18
Con Mean	83.82	1.787	1.309	1.1195	1.5726	0.6372	19.851
Con SD	14.2681	0.0665081	0.0974622	0.070788	0.259915	0.131879	3.21033
LL Mean	82.36	1.772	1.2507	1.159	1.8438	0.718	24.693
LL SD	16.1695	0.0796939	0.188264	0.0736795	0.369625	0.118754	5.34928
t	0.20311	0.433526	0.825016	-1.15978	-1.80055	-1.36589	-2.32838
p	0.832878	0.653155	0.395944	0.237279	0.0369296	0.0835484	0.0122615
d	0.0957471	0.204366	0.388916	-0.546726	-0.848789	-0.643887	-1.09761
SDp	46.5033	0.00107744	0.00449422	0.00104396	0.0204179	0.00314944	3.8921
SEp	6.81934	0.0328244	0.067039	0.0323104	0.142891	0.0561199	1.97284
95% CI LB	-14.8259	-0.0793359	-0.189696	-0.0238284	-0.00886656	-0.0291949	0.975234
95% CI UB	11.9059	0.0493359	0.0730964	0.102828	0.551267	0.190795	8.70877

## Sheet: Medial Contact Forces (BW)
Stride (%)	Con 1	Con 2	Con 3	Con 4	Con 5	Con 6	Con 7	Con 8	Con 9	Con 10	TTA 1	TTA 2	TTA 3	TTA 4	TTA 5	TFA 1	TFA 2	TFA 3	TFA 4	TFA 5
0	0.185222	0.248696	0.331285	0.0806559	0.248132	0.158382	0.286982	0.159824	0.199916	0.401725	0.468579	0.0560226	0.158009	0.0707652	0.273754	0.123767	0.291882	0.268054	0.370614	0.460987
1	0.285861	0.350127	0.430559	0.169195	0.410633	0.190466	0.268385	0.240906	0.251482	0.417537	0.756625	0.509592	0.464611	0.250206	0.874458	0.410185	0.687951	0.709095	0.829361	0.936799
2	0.338636	0.398723	0.472134	0.224232	0.498132	0.171122	0.245361	0.286121	0.243783	0.384517	0.751577	0.34431	0.720102	0.510089	0.562047	0.467112	0.6499	0.663248	0.708651	0.8911
3	0.330197	0.37822	0.43009	0.221577	0.489077	0.129596	0.211486	0.293181	0.160829	0.3007	0.545217	0	0.342288	0.497139	0.0582524	0.0848743	0.219878	0.263239	0.235019	0.32436
4	0.283191	0.313609	0.319712	0.157122	0.414576	0.269111	0.162711	0.28597	0.031781	0.203272	0.342385	0.119217	0.305379	0.244967	0.168968	0.472321	0.379084	0.169291	0.277082	0.679142
5	0.231697	0.247495	0.181301	0.200979	0.321495	0.447739	0.110183	0.343187	0	0.343173	0.574646	0.38863	0.65699	0.030102	0.22394	0.596395	0.441407	0.294051	0.269392	0.820365
6	0.27383	0.318357	0.0523104	0.354923	0.241424	0.652356	0.109841	0.567763	0	0.550904	1.01411	0.717644	0.972941	0.410995	0.566562	0.684314	0.630918	0.558075	0.325805	1.08061
7	0.415944	0.50344	0.0936658	0.549161	0.184978	0.86483	0.309636	0.81726	0.117377	0.811723	1.49342	0.918714	1.25469	0.71044	0.795862	1.15823	0.966465	0.87707	0.558063	1.48607
8	0.569174	0.714217	0.255604	0.766895	0.23609	1.06232	0.539139	1.06641	0.349644	1.09918	1.7339	1.15012	1.55698	0.779738	1.09459	1.71002	1.29716	1.15907	0.686569	1.94431
9	0.724205	0.926582	0.443592	0.984762	0.414885	1.22339	0.78182	1.29152	0.58952	1.37712	1.93005	1.52287	1.71449	0.936027	1.29255	1.82545	1.4352	1.41196	0.764744	2.08361
10	0.87335	1.11875	0.639275	1.18518	0.611622	1.3332	1.02056	1.47628	0.814112	1.61463	2.17274	1.63318	1.90348	1.1345	1.47348	1.95377	1.57943	1.68524	0.921847	2.12659
11	1.01026	1.27887	0.827109	1.35718	0.816713	1.38603	1.24174	1.61316	1.00477	1.79317	2.25245	1.64941	2.09061	1.21854	1.68843	2.1143	1.72082	1.87403	1.07977	2.21607
12	1.12739	1.40415	0.994579	1.49208	1.01948	1.38631	1.43544	1.70166	1.14455	1.90668	2.26622	1.71357	2.13521	1.22396	1.7198	2.15136	1.72004	1.87364	1.11586	2.14297
13	1.21677	1.49477	1.12897	1.58333	1.20848	1.34642	1.59359	1.74635	1.22304	1.96008	2.23494	1.68394	2.17232	1.23751	1.69117	2.16917	1.65732	1.74119	1.13478	1.98127
14	1.27418	1.55063	1.21971	1.62861	1.37468	1.28154	1.71111	1.75532	1.24145	1.96586	2.17828	1.6084	2.17363	1.31443	1.69087	2.14471	1.58378	1.61916	1.14879	1.80506
15	1.30124	1.57251	1.26394	1.63056	1.51255	1.20487	1.78793	1.73813	1.21166	1.9392	2.12079	1.52512	2.15212	1.40214	1.69476	2.09341	1.50051	1.51018	1.11945	1.64122
16	1.30336	1.56379	1.26862	1.59506	1.61969	1.12539	1.8281	1.69799	1.15135	1.89392	2.04085	1.4459	2.11522	1.43463	1.68871	2.02181	1.42295	1.43397	1.06933	1.50685
17	1.28655	1.53032	1.24765	1.52858	1.69634	1.04798	1.83722	1.58686	1.07835	1.84011	1.92047	1.37431	2.04705	1.43258	1.65297	1.93283	1.35671	1.39293	1.03021	1.38925
18	1.25578	1.47905	1.2159	1.43753	1.74432	0.974796	1.81994	1.46055	1.00608	1.78294	1.77877	1.2871	1.9601	1.41984	1.58338	1.83967	1.29889	1.36694	0.99217	1.29354
19	1.21482	1.41625	1.18344	1.32936	1.76545	0.906719	1.77929	1.32532	0.942058	1.72274	1.60277	1.20599	1.86893	1.39672	1.49909	1.7479	1.24981	1.35835	0.967895	1.20229
20	1.16652	1.34663	1.15324	1.21269	1.76047	0.843954	1.71793	1.18741	0.888591	1.65636	1.40677	1.13281	1.76383	1.37415	1.41266	1.66469	1.20596	1.35798	0.955226	1.10679
21	1.11311	1.27333	1.12257	1.09568	1.72941	0.786208	1.63781	1.05285	0.844029	1.57961	1.21367	1.07577	1.63964	1.32979	1.32473	1.57944	1.15434	1.33918	0.94474	0.99834
22	1.05646	1.1985	1.08641	0.984317	1.6729	0.732962	1.54155	0.92668	0.803955	1.48991	1.04568	1.02849	1.49815	1.2626	1.22388	1.49624	1.10103	1.30722	0.932119	0.897556
23	0.998383	1.12418	1.04071	0.882133	1.59334	0.683776	1.43289	0.811851	0.763086	1.38842	0.909226	0.986781	1.34926	1.19168	1.12949	1.40499	1.04694	1.26418	0.919381	0.813124
24	0.94082	1.05299	0.984688	0.790804	1.49505	0.638357	1.31701	0.786105	0.717818	1.28116	0.791192	0.940535	1.21395	1.1276	1.04491	1.31223	0.992309	1.2062	0.905083	0.744344
25	0.884366	0.988087	0.921452	0.710861	1.38401	0.5964	1.20006	0.891261	0.668094	1.17761	0.701676	0.898664	1.10975	1.07504	0.973046	1.21373	0.93987	1.15901	0.880942	0.688899
26	0.810893	0.932221	0.856791	0.642191	1.26734	0.557486	1.08826	0.994644	0.617364	1.07475	0.645982	0.877457	1.03554	1.04062	0.921217	1.12278	0.895833	1.12804	0.850704	0.650974
27	0.742807	0.886594	0.796848	0.584562	1.15258	0.521262	0.984908	1.09488	0.570813	0.970442	0.608808	0.872431	0.982102	1.0163	0.88127	1.04748	0.861819	1.11661	0.817301	0.623416
28	0.679983	0.850446	0.74597	0.545517	1.04646	0.487721	0.880257	1.1902	0.550947	0.882724	0.586272	0.880258	0.945538	0.987893	0.852929	0.991901	0.83673	1.1151	0.780475	0.608693
29	0.622309	0.821691	0.70578	0.573256	0.953446	0.473296	0.790463	1.27895	0.582722	0.809325	0.582272	0.894388	0.916113	0.963972	0.837211	0.959972	0.821556	1.11829	0.758159	0.594425
30	0.569851	0.797409	0.675528	0.604039	0.8751	0.486262	0.715247	1.35997	0.619694	0.747675	0.587473	0.90467	0.897795	0.929268	0.827525	0.934508	0.810374	1.11849	0.748172	0.586101
31	0.522912	0.762556	0.660632	0.638215	0.81058	0.499783	0.653899	1.43257	0.660741	0.695222	0.59914	0.900396	0.885533	0.892108	0.822143	0.916013	0.800091	1.10801	0.743899	0.622762
32	0.481973	0.733156	0.685012	0.6754	0.758049	0.514786	0.605325	1.49639	0.704218	0.77412	0.616596	0.890424	0.880401	0.857325	0.826653	0.886766	0.786109	1.08543	0.734131	0.660132
33	0.538724	0.73235	0.707061	0.714916	0.716015	0.531644	0.568092	1.54913	0.748607	0.865909	0.637152	0.887794	0.883315	0.838366	0.839679	0.871344	0.776101	1.05523	0.718125	0.694852
34	0.598506	0.782928	0.726947	0.755968	0.684004	0.550485	0.540549	1.5915	0.792622	0.958115	0.657494	0.892262	0.897717	0.817764	0.854084	0.840451	0.768804	1.02995	0.699386	0.745626
35	0.656806	0.821851	0.745224	0.797519	0.662398	0.571444	0.52102	1.63316	0.835058	1.04868	0.682708	0.85489	0.918695	0.797152	0.869536	0.798864	0.76329	1.0037	0.680397	0.806948
36	0.713607	0.855536	0.762912	0.838243	0.651849	0.594766	0.507999	1.67441	0.874727	1.13459	0.705037	0.832835	0.946854	0.770459	0.884871	0.833795	0.765837	0.98483	0.663882	0.893443
37	0.769118	0.89181	0.781576	0.876827	0.652753	0.620695	0.500246	1.70384	0.910494	1.21269	0.726291	0.870859	0.97736	0.760678	0.877423	0.90084	0.770176	0.969639	0.646735	1.00449
38	0.823507	0.929785	0.803141	0.912415	0.664987	0.649158	0.511119	1.72744	0.941216	1.28023	0.753672	0.901645	1.00917	0.767123	0.858401	0.964149	0.799034	0.969991	0.636796	1.11803
39	0.876637	0.963532	0.829324	0.944718	0.700341	0.679329	0.566	1.74426	0.965638	1.33482	0.791579	0.924075	1.04093	0.767816	0.845251	1.03272	0.858078	0.973734	0.624822	1.24626
40	0.92782	0.981951	0.860868	0.973617	0.751968	0.709137	0.623867	1.753	0.982388	1.37374	0.840447	0.935946	1.07172	0.765869	0.833194	1.09927	0.915207	0.992724	0.61755	1.36392
41	0.97551	0.991748	0.896974	0.998543	0.806429	0.735017	0.683207	1.75232	0.990033	1.39315	0.890702	0.934202	1.10114	0.8114	0.823584	1.16454	0.965238	0.985046	0.61759	1.44473
42	1.01698	0.990894	0.935097	1.01807	0.854377	0.752225	0.741479	1.741	0.987191	1.38808	0.944485	0.926159	1.12473	0.848337	0.82098	1.23253	1.00565	0.970202	0.620898	1.46724
43	1.0482	0.977262	0.970987	1.02994	0.881376	0.755706	0.79503	1.71779	0.972744	1.35334	1.00452	0.907871	1.1461	0.875109	0.825066	1.29005	1.03488	0.943342	0.620531	1.44734
44	1.06407	0.949039	0.998846	1.03159	0.896098	0.741306	0.839168	1.68125	0.945969	1.28487	1.06008	0.890172	1.16337	0.901784	0.837068	1.32525	1.04666	0.907743	0.66231	1.36758
45	1.05928	0.969671	1.01173	1.021	0.894245	0.706959	0.868483	1.63009	0.906435	1.1813	1.11511	0.865998	1.16898	0.912249	0.854079	1.36081	1.04944	0.873774	0.693452	1.27075
46	1.02953	1.04279	1.00246	0.997347	0.891167	0.738105	0.877476	1.56357	0.853844	1.04503	1.15687	0.825207	1.17189	0.898908	0.878848	1.42032	1.04468	0.837748	0.719442	1.1488
47	0.972555	1.12013	1.03408	0.960965	0.953254	0.786262	0.86144	1.48182	0.794253	1.11444	1.19893	0.815973	1.1661	0.868255	0.903055	1.49838	1.02556	0.799468	0.729999	1.00959
48	0.888757	1.1993	1.06086	0.912658	1.02535	0.833141	0.817428	1.38559	0.828528	1.24162	1.22956	0.833421	1.15482	0.842311	0.923248	1.53506	0.957735	0.754581	0.715281	0.865431
49	0.781265	1.27663	1.06532	0.954418	1.10485	0.873446	0.798309	1.27539	0.851358	1.3573	1.23853	0.851109	1.13638	0.803522	0.937676	1.52232	0.869695	0.702048	0.685765	0.706181
50	0.695669	1.34698	1.04077	0.991518	1.18699	0.898027	0.879979	1.15032	0.854924	1.44914	1.22796	0.853767	1.10697	0.738946	0.932727	1.4488	0.761193	0.649231	0.640814	0.656423
51	0.740202	1.33447	0.981242	1.01186	1.20363	0.89508	0.962421	1.00793	0.831148	1.39623	1.18561	0.805746	1.06149	0.655885	0.925432	1.28506	0.623635	0.597937	0.581304	0.637179
52	0.764799	1.28339	0.883704	1.0094	1.18357	0.853603	1.03753	0.847279	0.773877	1.29686	1.11309	0.740292	0.997176	0.552764	0.896754	1.07217	0.512025	0.561066	0.502468	0.61494
53	0.763543	1.2005	0.750749	0.979148	1.1321	0.768482	1.09628	0.852023	0.681621	1.15924	1.02361	0.659395	0.918771	0.417291	0.860287	0.835225	0.493143	0.52127	0.401983	0.590467
54	0.655857	1.08667	0.592097	0.918283	1.05068	0.645051	1.12997	0.853629	0.560029	0.993009	0.914017	0.55565	0.824943	0.272227	0.814634	0.567223	0.479451	0.511431	0.353934	0.5516
55	0.528961	0.946572	0.423867	0.827262	0.944774	0.499629	1.03246	0.829694	0.422462	0.812998	0.827614	0.431202	0.730006	0.112641	0.764507	0.444521	0.465546	0.508711	0.325401	0.491092
56	0.396161	0.788914	0.26517	0.710561	0.821258	0.353675	0.90359	0.763665	0.286768	0.636101	0.743235	0.284069	0.580622	0	0.67467	0.457256	0.446416	0.522194	0.289045	0.380186
57	0.269034	0.625599	0.13254	0.576477	0.686383	0.224142	0.754196	0.588808	0.168484	0.476516	0.664893	0.111386	0.399246	0	0.544483	0.365535	0.382763	0.534543	0.252343	0.256714
58	0.157949	0.469688	0.0343351	0.435552	0.545832	0.117277	0.598844	0.428138	0.0747088	0.341798	0.555749	0	0.239469	0	0.41107	0.226457	0.303012	0.583999	0.207781	0.147031
59	0.0689379	0.332379	0	0.298225	0.406306	0.0306652	0.451544	0.290436	0.00374431	0.232412	0.428515	0	0.118521	0	0.292999	0.0695681	0.210963	0.593722	0.150623	0.0399293
60	0.00277819	0.220078	0	0.173324	0.276595	0	0.321782	0.178121	0	0.144728	0.298555	0	0.038196	0	0.188395	0	0.121186	0.48157	0.0879911	0
61	0	0.133154	0	0.0678944	0.166157	0	0.213223	0.0895662	0	0.074959	0.172532	0	0	0.00162287	0.113868	0	0.0499717	0.355076	0.0189941	0
62	0	0.0676424	0	0	0.0812521	0	0.125158	0.0223107	0	0.0216544	0.0795803	0	0	0.0124098	0.0694241	0	0	0.223736	0	0
63	0	0.0191317	0	0	0.0216828	0	0.0551973	0	0	0	0.0435354	0	0	0	0.0437248	0	0	0.0950147	0	0
64	0	0	0	0	0	0	0.0019438	0	0	0	0	0	0	0	0.0261592	0	0	0.00943325	0	0
65	0	0	0	0	0	0	0	0	0	0	0	0	0	0	0.0197422	0	0	0	0	0
66	0	0	0	0	0	0	0	0	0	0	0	0	0	0	0	0	0	0	0	0
67	0	0	0	0	0	0	0	0	0	0.00581282	0.0130685	0	0	0	0	0	0	0	0	0
68	0	0	0	0	0	0.0223948	0	0	0.00683799	0.0245123	0.0338127	0	0	0	0	0	0	0	0	0
69	0.00119634	0.00970359	0	0	0	0.0426547	0.000985264	0	0.0186534	0.0356973	0.0483573	0	0	0	0	0	0	0	0	0
70	0.0116147	0.0194506	0.00518574	0.00365953	0	0.051045	0.0280775	0.000195762	0.0205318	0.0376555	0.0536853	0	0.00759083	0	0	0	0	0	0	0.00806513
71	0.0158558	0.022491	0.0176232	0.0115047	0	0.0488858	0.0484956	0.0113358	0.0149085	0.0318642	0.0499853	0	0.0214373	0	0	0	0	0	0	0.0093282
72	0.0153795	0.0196745	0.0225595	0.0123321	0	0.0388124	0.0586019	0.0131749	0.0050248	0.0215105	0.0400198	0	0.0235326	0.00306938	0	0.0142322	0.00818905	0.00878246	0.0122482	0.00560557
73	0.01229	0.0129809	0.021813	0.00897931	0	0.0237684	0.0580719	0.00742532	0	0.0099158	0.0274711	0.000744503	0.0167583	0.00163867	0	0.0241623	0.0151092	0.0260115	0.0201414	0
74	0.0085592	0.0044407	0.0179914	0.00393657	0	0	0.0491568	0	0	0	0.0131011	0	0.00584811	0	0	0.0206969	0.0140588	0.029099	0.0172948	0
75	0.0054872	0	0.00749225	0	0	0	0.0353131	0	0	0	0	0	0	0	0	0.0115274	0.00746042	0.0203793	0.00806786	0
76	0.00351115	0	0	0	0	0	0.0198148	0	0	0	0	0	0	0	0	0.00160369	0	0.00467082	0	0
77	0.00232626	0	0	0	0	0	0.00484558	0	0	0	0	0.00456643	0	0	0	0	0	0	0	0
78	0	0	0	0	0	0	0	0	0	0.000912412	0	0.0315677	0	0.0157124	0	0	0	0	0	0
79	0	0	0	0	0	0	0	0	0	0.00700464	0.00384693	0.0459017	0	0.0199926	0	0	0	0	0	0
80	0	0	0	0.000777573	0	0	0	0	0.00235405	0.0120573	0.0165722	0.0591296	0	0.023482	0	0	0	0	0	0
81	0	0	0	0.00342675	0	0	0	0	0.00932926	0.015184	0.0231627	0.0717821	0	0.0270528	0	0.000833239	0.0102204	0.0132455	0.00299473	0.0242742
82	0	0	0.00317045	0.00729075	0	0	0	0	0.0178717	0.015824	0.0303347	0.083125	0	0.0314718	0	0.0154569	0.0262238	0.0328288	0.0145384	0.0468281
83	0.00338329	0	0.0205586	0.0130626	0	0	0	0	0.0282765	0.0142406	0.038432	0.0932211	0.0026877	0.0377468	0	0.0347717	0.046082	0.0581368	0.0276103	0.074342
84	0.00639075	0	0.0307434	0.0214137	0	0.00203921	0	0	0.0412641	0.0119775	0.0476548	0.102518	0.0200505	0.0464454	0	0.0568091	0.0694356	0.0883072	0.0431134	0.106907
85	0.0116852	0	0.0390306	0.0330717	0	0.00734973	0	0.00236611	0.0579871	0.0120609	0.0590075	0.111916	0.0447115	0.0585229	0.00568934	0.0794187	0.0963192	0.122902	0.0621704	0.14571
86	0.0215088	0	0.0523018	0.04892	0	0.0171927	0	0.0140692	0.0798352	0.0187669	0.0742598	0.122725	0.0797723	0.0744307	0.0175157	0.100251	0.126447	0.161885	0.0859449	0.190191
87	0.0389907	0.0116559	0.0735623	0.0700154	0	0.0336588	0.0101791	0.0320228	0.108055	0.0368754	0.0959443	0.137247	0.127128	0.0942075	0.0327151	0.117387	0.159493	0.205106	0.115637	0.239125
88	0.0678628	0.0350781	0.106231	0.0974111	0	0.0589072	0.0272149	0.0573867	0.14325	0.0704551	0.127478	0.158176	0.1878	0.117314	0.0553284	0.131282	0.195202	0.251668	0.151841	0.29061
89	0.111653	0.0700101	0.153172	0.131726	0	0.0947439	0.0527906	0.0905461	0.184841	0.12141	0.172096	0.189092	0.259258	0.143091	0.0908423	0.146036	0.234641	0.300406	0.196365	0.34404
90	0.172345	0.117828	0.21527	0.172489	0.0162472	0.141924	0.0889558	0.130568	0.230595	0.188243	0.230731	0.230515	0.333796	0.171374	0.1452	0.169082	0.27898	0.348991	0.250446	0.398708
91	0.248789	0.177918	0.289964	0.217453	0.0623151	0.199261	0.136475	0.174644	0.276372	0.265539	0.299945	0.279416	0.402985	0.202203	0.220882	0.208458	0.327359	0.393069	0.313158	0.450431
92	0.335452	0.246721	0.370331	0.262275	0.12797	0.262809	0.193841	0.217907	0.316288	0.344448	0.37093	0.32888	0.460711	0.23484	0.310591	0.2664	0.375349	0.426252	0.380263	0.491978
93	0.422156	0.317274	0.445358	0.3009	0.208767	0.325559	0.256668	0.253991	0.343456	0.413967	0.430739	0.369301	0.503895	0.267659	0.3953	0.337013	0.414916	0.440692	0.443028	0.51418
94	0.495312	0.379788	0.501807	0.326714	0.293392	0.378123	0.317868	0.276476	0.351408	0.462753	0.465028	0.391184	0.529095	0.298975	0.454232	0.408128	0.436126	0.429937	0.487153	0.507674
95	0.540661	0.423515	0.527514	0.33411	0.365107	0.410588	0.368727	0.280842	0.335994	0.48136	0.464772	0.388238	0.529446	0.325944	0.478029	0.465221	0.430709	0.391614	0.497167	0.466578
96	0.546841	0.439561	0.515137	0.319919	0.40615	0.415151	0.400788	0.266321	0.297232	0.464727	0.430355	0.359603	0.498997	0.343735	0.467376	0.493399	0.395446	0.32898	0.464499	0.393127
97	0.508628	0.423657	0.464889	0.284266	0.403412	0.388684	0.408132	0.236847	0.240072	0.414177	0.368656	0.310954	0.439117	0.344911	0.425576	0.478381	0.333421	0.252317	0.392339	0.298645
98	0.428751	0.377725	0.384821	0.23065	0.353091	0.334133	0.389457	0.200184	0.173005	0.337583	0.287504	0.254086	0.360857	0.323922	0.360507	0.41183	0.253769	0.17789	0.293132	0.201756
99	0.317628	0.309512	0.287665	0.165204	0.262754	0.259888	0.349136	0.164371	0.104419	0.246563	0.202354	0.206077	0.28314	0.276998	0.289283	0.3004	0.172033	0.124425	0.185833	0.0867056
100	0.19107	0.230448	0.185357	0.0953654	0.150089	0.177216	0.296517	0.132774	0	0.151648	0.11933	0.185296	0.0858369	0.220778	0.232006	0.163698	0.105435	0.104932	0.0940586	0

## Sheet: Knee Angles (deg)
Stride (%)	Con 1	Con 2	Con 3	Con 4	Con 5	Con 6	Con 7	Con 8	Con 9	Con 10	TTA 1	TTA 2	TTA 3	TTA 4	TTA 5	TFA 1	TFA 2	TFA 3	TFA 4	TFA 5
0	-2.22905	0.93796	-3.36081	3.10431	-1.89092	1.05331	2.87592	-0.50519	0.10665	-0.33758	-5.71421	-6.52495	-9.16281	-4.88778	0.22845	-1.78558	-1.79393	-2.31327	-2.35878	-0.71809
1	-0.70294	2.29155	-1.8308	5.10232	-0.28854	2.27708	3.92936	0.61198	1.27011	1.1675	-7.47793	-8.81959	-10.7885	-5.50099	-0.22189	-3.98492	-3.63679	-3.83394	-4.32298	-2.4053
2	0.93983	3.69893	-0.14715	7.1187	1.23429	3.66215	5.53372	1.67551	2.33997	2.66057	-9.32395	-11.2326	-12.6384	-6.64643	-1.34509	-6.35386	-5.65173	-5.39058	-6.47592	-4.38655
3	2.55306	5.03571	1.48088	9.07582	2.58416	5.09786	7.27601	2.68354	3.32318	4.13857	-11.205	-13.6639	-14.5961	-8.14831	-2.93484	-8.6969	-7.65974	-6.85582	-8.55665	-6.52957
4	4.08599	6.26501	2.95692	10.9567	3.8144	6.55623	9.10251	3.6849	4.29513	5.62683	-13.1335	-16.0564	-16.6301	-9.86616	-4.81342	-10.9699	-9.60402	-8.21388	-10.4685	-8.76377
5	5.55377	7.40251	4.28393	12.7797	5.03918	8.04059	10.9691	4.72674	5.34202	7.13414	-15.132	-18.3524	-18.7605	-11.7093	-6.85355	-13.2123	-11.4978	-9.51491	-12.2198	-11.0442
6	6.99181	8.47982	5.53007	14.5663	6.3572	9.54571	12.8716	5.82083	6.51516	8.64127	-17.1925	-20.4742	-20.9901	-13.6161	-8.97797	-15.4519	-13.3599	-10.8088	-13.8559	-13.3231
7	8.41989	9.5254	6.78999	16.3182	7.81292	11.0438	14.7905	6.93521	7.81089	10.1119	-19.2655	-22.3405	-23.2534	-15.516	-11.1359	-17.6648	-15.1822	-12.1022	-15.4173	-15.5444
8	9.82448	10.5534	8.14452	18.0043	9.38879	12.4716	16.6819	8.00848	9.17185	11.5042	-21.271	-23.896	-25.4246	-17.3093	-13.2696	-19.7822	-16.9216	-13.3519	-16.9085	-17.644
9	11.1566	11.5583	9.62263	19.5592	11.0212	13.7421	18.4868	8.9704	10.5069	12.7767	-23.1179	-25.1253	-27.366	-18.8837	-15.2992	-21.7031	-18.5046	-14.4833	-18.2839	-19.5482
10	12.3461	12.5167	11.1824	20.9008	12.6272	14.782	20.145	9.75649	11.7233	13.8934	-24.7235	-26.0434	-28.9751	-20.1538	-17.1313	-23.3185	-19.8457	-15.4158	-19.4708	-21.1775
11	13.3283	13.395	12.7232	21.9583	14.1278	15.5533	21.6059	10.3202	12.7512	14.8279	-26.0306	-26.6745	-30.2092	-21.0871	-18.679	-24.5505	-20.878	-16.0875	-20.4129	-22.4612
12	14.0659	14.1571	14.1277	22.6951	15.4576	16.0504	22.8345	10.6387	13.5511	15.564	-27.0121	-27.0354	-31.08	-21.7	-19.8841	-25.3705	-21.5729	-16.4692	-21.0966	-23.3554
13	14.5523	14.7736	15.3072	23.1119	16.5636	16.2915	23.8115	10.7104	14.1079	16.0927	-27.6659	-27.1337	-31.6263	-22.0389	-20.7297	-25.7879	-21.9377	-16.5667	-21.5484	-23.8478
14	14.8043	15.2264	16.2184	23.2331	17.408	16.3095	24.5321	10.552	14.4236	16.4109	-28.0053	-26.9742	-31.8876	-22.1628	-21.2358	-25.8363	-22.004	-16.4143	-21.815	-23.9505
15	14.8548	15.5099	16.8586	23.0924	17.9805	16.1462	25.0045	10.1923	14.5135	16.5229	-28.0525	-26.5657	-31.8948	-22.1288	-21.447	-25.5671	-21.8165	-16.0644	-21.9424	-23.6921
16	14.7444	15.6295	17.2498	22.7261	18.3006	15.8462	25.2322	9.66448	14.4052	16.4423	-27.8352	-25.9275	-31.6745	-21.9835	-21.4185	-25.0435	-21.4238	-15.5759	-21.9638	-23.1119
17	14.5123	15.599	17.4253	22.1693	18.4059	15.4496	25.246	9.00094	14.1367	16.1907	-27.3875	-25.0908	-31.2518	-21.759	-21.2022	-24.3313	-20.872	-15.0029	-21.8975	-22.2563
18	14.1893	15.4368	17.418	21.4537	18.3395	14.9872	25.0651	8.2324	13.7518	15.7954	-26.7492	-24.0966	-30.6502	-21.4749	-20.8416	-23.4879	-20.2009	-14.3857	-21.753	-21.1768
19	13.7962	15.1615	17.2564	20.6056	18.1433	14.4802	24.6734	7.38779	13.2914	15.2852	-25.9636	-22.9913	-29.8911	-21.1422	-20.3718	-22.5556	-19.4418	-13.7482	-21.5371	-19.9264
20	13.3455	14.789	16.9634	19.6475	17.8521	13.9422	24.1622	6.4945	12.7861	14.6871	-25.0752	-21.8263	-28.9964	-20.7678	-19.8189	-21.5607	-18.6192	-13.1013	-21.2584	-18.5564
21	12.845	14.332	16.5556	18.6009	17.4854	13.3858	23.5253	5.57613	12.2555	14.0236	-24.1278	-20.6542	-27.9925	-20.3586	-19.1997	-20.519	-17.7515	-12.448	-20.9246	-17.1146
22	12.3005	13.8027	16.0455	17.4873	17.0465	12.8257	22.7867	4.65171	11.7115	13.3132	-23.1621	-19.5231	-26.9134	-19.9221	-18.524	-19.4415	-16.8542	-11.7897	-20.5426	-15.6429
23	11.7179	13.2157	15.4438	16.3289	16.5275	12.2772	21.9642	3.73559	11.159	12.5708	-22.2137	-18.4713	-25.7989	-19.4678	-17.8014	-18.3388	-15.9409	-11.1296	-20.1191	-14.1763
24	11.1037	12.5882	14.7629	15.149	15.9172	11.7555	21.0775	2.84109	10.5973	11.8099	-21.3111	-17.5224	-24.6897	-19.0047	-17.0454	-17.2234	-15.0265	-10.4758	-19.6633	-12.7436
25	10.4641	11.9388	14.0192	13.97	15.2115	11.2728	20.1468	1.9852	10.024	11.0414	-20.4752	-16.679	-23.6208	-18.539	-16.2732	-16.1076	-14.1256	-9.83889	-19.1883	-11.3676
26	9.80496	11.2857	13.2319	12.8117	14.424	10.8358	19.1916	1.18668	9.43937	10.2729	-19.7189	-15.9239	-22.6204	-18.073	-15.5045	-15.0001	-13.2512	-9.23065	-18.7088	-10.065
27	9.13284	10.6444	12.4213	11.6907	13.5798	10.4456	18.2294	0.46299	8.84728	9.5077	-19.049	-15.2333	-21.7081	-17.605	-14.7571	-13.9053	-12.4126	-8.65986	-18.2387	-8.84651
28	8.45532	10.0274	11.6071	10.6204	12.7015	10.0989	17.275	-0.1714	8.25416	8.74522	-18.4685	-14.5899	-20.8939	-17.1298	-14.0424	-12.8239	-11.6161	-8.13223	-17.7878	-7.72043
29	7.78087	9.44344	10.8066	9.61126	11.807	9.79157	16.3418	-0.70724	7.66915	7.98401	-17.9772	-13.9826	-20.177	-16.6389	-13.3659	-11.7559	-10.8656	-7.65072	-17.362	-6.69363
30	7.1195	8.89833	10.0337	8.66991	10.9103	9.51939	15.4403	-1.14149	7.10199	7.22437	-17.5718	-13.4041	-19.5509	-16.1233	-12.729	-10.702	-10.1635	-7.2159	-16.9645	-5.77144
31	6.48304	8.39554	9.30025	7.79928	10.0229	9.27853	14.5769	-1.47953	6.559	6.47081	-17.246	-12.8501	-19.0076	-15.5755	-12.1289	-9.66494	-9.51092	-6.82695	-16.596	-4.95582
32	5.88364	7.93689	8.6156	7.00018	9.15466	9.06568	13.7535	-1.73604	6.043	5.73269	-16.9917	-12.3197	-18.5395	-14.9886	-11.5581	-8.65196	-8.90835	-6.48272	-16.2542	-4.24451
33	5.33141	7.52333	7.98632	6.27214	8.31712	8.87862	12.9692	-1.93059	5.55654	5.02299	-16.7996	-11.8177	-18.1415	-14.3567	-11.0035	-7.67533	-8.35566	-6.18191	-15.9337	-3.63175
34	4.83194	7.1561	7.41567	5.61375	7.52385	8.71547	12.2209	-2.08151	5.10583	4.35719	-16.6608	-11.3552	-17.8111	-13.6773	-10.4495	-6.75297	-7.85257	-5.92395	-15.624	-3.10936
35	4.38559	6.83604	6.9049	5.02375	6.78844	8.57528	11.5052	-2.19908	4.70142	3.75223	-16.5669	-10.9477	-17.5459	-12.9549	-9.88327	-5.90641	-7.39889	-5.71013	-15.312	-2.66696
36	3.9886	6.56402	6.45484	4.50189	6.12083	8.46007	10.8204	-2.28292	4.3558	3.22635	-16.5099	-10.6116	-17.3428	-12.2005	-9.29869	-5.1563	-6.99462	-5.54338	-14.9845	-2.29432
37	3.63511	6.34159	6.06639	4.05052	5.52324	8.37674	10.1686	-2.32598	4.08206	2.79859	-16.4822	-10.3613	-17.1967	-11.4314	-8.69934	-4.51768	-6.64073	-5.42773	-14.6304	-1.98711
38	3.32042	6.17175	5.74038	3.67635	4.99251	8.3367	9.5567	-2.31909	3.8941	2.48878	-16.4778	-10.2067	-17.1	-10.6718	-8.09925	-3.99732	-6.34013	-5.36731	-14.2445	-1.75135
39	3.0451	6.06046	5.47927	3.39108	4.52531	8.35546	8.99633	-2.25255	3.80855	2.3173	-16.4938	-10.1502	-17.0427	-9.95135	-7.52267	-3.59293	-6.09743	-5.36569	-13.83	-1.60104
40	2.81766	6.01665	5.28887	3.21034	4.11827	8.45351	8.50342	-2.11607	3.84415	2.30464	-16.5325	-10.1863	-17.0146	-9.30069	-7.00152	-3.29441	-5.91779	-5.42675	-13.3973	-1.55267
41	2.65519	6.05092	5.17973	3.15236	3.77292	8.6556	8.09659	-1.89922	4.01845	2.47063	-16.6018	-10.3074	-17.0076	-8.74822	-6.57097	-3.08856	-5.80612	-5.55499	-12.9612	-1.61978
42	2.58166	6.17416	5.16722	3.2351	3.50151	8.98852	7.7959	-1.59267	4.34517	2.83233	-16.7142	-10.5086	-17.0165	-8.31725	-6.2655	-2.96349	-5.76589	-5.75348	-12.5383	-1.80823
43	2.62421	6.39732	5.27053	3.47494	3.32841	9.47862	7.62191	-1.19074	4.8349	3.40008	-16.8863	-10.7892	-17.0394	-8.02342	-6.11406	-2.91121	-5.799	-6.02357	-12.1475	-2.1137
44	2.80878	6.73133	5.50955	3.8861	3.28624	10.1482	7.59434	-0.69407	5.49615	4.17355	-17.1373	-11.1512	-17.0781	-7.87141	-6.13495	-2.92981	-5.90731	-6.36633	-11.8105	-2.52257
45	3.15702	7.18681	5.90123	4.47947	3.40848	11.0122	7.73041	-0.11012	6.33643	5.1416	-17.4877	-11.5989	-17.1388	-7.8549	-6.33347	-3.02403	-6.09382	-6.78313	-11.5513	-3.01684
46	3.68436	7.77285	6.4568	5.26015	3.71923	12.0763	8.04354	0.5509	7.36426	6.28667	-17.9593	-12.141	-17.2323	-7.96045	-6.70267	-3.2052	-6.36392	-7.27569	-11.3937	-3.5811
47	4.39928	8.49621	7.18161	6.22557	4.22863	13.3377	8.54313	1.28176	8.59062	7.59116	-18.5736	-12.7912	-17.3734	-8.17286	-7.2265	-3.49091	-6.72629	-7.84726	-11.3577	-4.20931
48	5.30427	9.3616	8.07633	7.36575	4.93472	14.7873	9.2353	2.07977	10.0289	9.04442	-19.3503	-13.5698	-17.5804	-8.48203	-7.88571	-3.90538	-7.19333	-8.50193	-11.4567	-4.90934
49	6.3989	10.3744	9.14065	8.66758	5.82997	16.4152	10.1244	2.94932	11.6945	10.6477	-20.3071	-14.5025	-17.8755	-8.88987	-8.66297	-4.47909	-7.7816	-9.24359	-11.6981	-5.7056
50	7.68486	11.5441	10.3785	10.1194	6.90845	18.2164	11.2154	3.90559	13.6032	12.4156	-21.4594	-15.6204	-18.2858	-9.41474	-9.54674	-5.24753	-8.51215	-10.0767	-12.0864	-6.63797
51	9.17163	12.8863	11.8029	11.7161	8.17362	20.1942	12.5164	4.97663	15.7694	14.374	-22.82	-16.9581	-18.8439	-10.0905	-10.5342	-6.24883	-9.40987	-11.0085	-12.6247	-7.75749
52	10.8791	14.4233	13.4385	13.463	9.64285	22.3587	14.0396	6.20245	18.2048	16.5553	-24.3977	-18.5499	-19.5868	-10.9629	-11.6324	-7.52121	-10.503	-12.0531	-13.317	-9.12064
53	12.8362	16.1827	15.3203	15.3774	11.3463	24.7253	15.7999	7.63095	20.9174	18.9898	-26.1953	-20.4274	-20.5548	-12.0832	-12.8579	-9.10017	-11.8226	-13.2352	-14.1722	-10.7827
54	15.0761	18.1951	17.4872	17.4878	13.3219	27.3101	17.8129	9.31366	23.9071	21.6979	-28.2089	-22.6156	-21.7874	-13.5024	-14.238	-11.0152	-13.4012	-14.5898	-15.2086	-12.7912
55	17.6282	20.4902	19.9733	19.829	15.6098	30.1233	20.0924	11.2978	27.1566	24.6845	-30.4285	-25.1263	-23.3182	-15.2671	-15.8106	-13.289	-15.2712	-16.1605	-16.4557	-15.1795
56	20.5096	23.0919	22.798	22.4349	18.2468	33.164	22.6486	13.6201	30.6254	27.9349	-32.8386	-27.9554	-25.1705	-17.4164	-17.6181	-15.9381	-17.4612	-17.994	-17.9514	-17.9615
57	23.7161	26.0116	25.9584	25.3285	21.2586	36.4157	25.4837	16.299	34.2533	31.4133	-35.4182	-31.0808	-27.352	-19.9778	-19.6981	-18.9725	-19.9916	-20.1335	-19.7345	-21.126
58	27.2158	29.2423	29.4257	28.5102	24.6533	39.8425	28.5869	19.3264	37.9702	35.0627	-38.1391	-34.4601	-29.8518	-22.9621	-22.0776	-22.3931	-22.8694	-22.6109	-21.8391	-24.6345
59	30.9458	32.755	33.1462	31.9491	28.415	43.3857	31.9304	22.665	41.7047	38.8084	-40.9645	-38.0303	-32.6427	-26.3573	-24.7707	-26.1834	-26.0831	-25.4403	-24.2876	-28.421
60	34.8169	36.4982	37.0454	35.5813	32.4964	46.9692	35.4683	26.2532	45.3885	42.5685	-43.8494	-41.7153	-35.6851	-30.1236	-27.777	-30.2986	-29.598	-28.6116	-27.0836	-32.3981
61	38.7249	40.3997	41.0357	39.3178	36.8161	50.5096	39.1382	30.0127	48.9592	46.2645	-46.7465	-45.4328	-38.9337	-34.1888	-31.08	-34.6568	-33.3553	-32.0883	-30.2086	-36.4673
62	42.5656	44.3701	45.0249	43.0559	41.263	53.9259	42.8642	33.8616	52.3583	49.827	-49.6103	-49.0999	-42.3417	-38.4493	-34.6441	-39.1431	-37.2767	-35.8084	-33.6261	-40.5293
63	46.2461	48.308	48.9228	46.6944	45.7133	57.1456	46.5654	37.7237	55.5281	53.192	-52.4003	-52.634	-45.861	-42.7792	-38.4123	-43.6289	-41.2747	-39.6886	-37.2884	-44.493
64	49.6902	52.1066	52.6426	50.1412	50.0482	60.1079	50.1622	41.5298	58.406	56.2972	-55.0776	-55.9528	-49.4402	-47.0476	-42.3063	-47.9918	-45.2596	-43.6301	-41.1388	-48.2777
65	52.8399	55.6636	56.1011	53.3172	54.1638	62.7659	53.5803	45.2099	60.9276	59.0843	-57.6001	-58.9778	-53.0219	-51.1373	-46.2329	-52.1252	-49.1427	-47.5235	-45.1093	-51.8131
66	55.6545	58.8942	59.2208	56.1576	57.9786	65.0854	56.7537	48.6838	63.0388	61.5076	-59.919	-61.6439	-56.5363	-54.9583	-50.0946	-55.944	-52.8409	-51.2589	-49.121	-55.0397
67	58.1084	61.7405	61.9372	58.6161	61.4406	67.0436	59.6254	51.8601	64.7079	63.5409	-61.9826	-63.9083	-59.8976	-58.4522	-53.7997	-59.3907	-56.2821	-54.7377	-53.0871	-57.9128
68	60.1877	64.1719	64.2045	60.6679	64.5259	68.6242	62.1486	54.6462	65.929	65.1773	-63.744	-65.7522	-63.0039	-61.5872	-57.2651	-62.4361	-59.4094	-57.8791	-56.9167	-60.4057
69	61.8873	66.1763	65.9989	62.3055	67.2281	69.8154	64.2876	56.9671	66.7185	66.4218	-65.1695	-67.174	-65.7506	-64.3481	-60.4161	-65.074	-62.1807	-60.6227	-60.5189	-62.5073
70	63.2099	67.7499	67.3179	63.531	69.5424	70.6107	66.0186	58.7823	67.1074	67.2816	-66.2414	-68.1783	-68.053	-66.7258	-63.1873	-67.3143	-64.5653	-62.9252	-63.8057	-64.216
71	64.1642	68.8916	68.1767	64.3479	71.4536	71.0101	67.33	60.0841	67.1285	67.761	-66.9542	-68.7699	-69.8639	-68.7112	-65.5277	-69.1756	-66.5401	-64.7538	-66.6979	-65.5331
72	64.7625	69.6034	68.6027	64.7569	72.9403	71.0203	68.219	60.883	66.8063	67.8614	-67.3088	-68.9552	-71.1707	-70.2954	-67.4014	-70.6769	-68.0883	-66.081	-69.1362	-66.4591
73	65.0187	69.8937	68.6282	64.7575	73.9883	70.6546	68.6878	61.1935	66.1516	67.5827	-67.3082	-68.7432	-71.9784	-71.4723	-68.7844	-71.8298	-69.1989	-66.8865	-71.0866	-66.9928
74	64.9457	69.7771	68.2845	64.3536	74.6004	69.9301	68.7422	61.0275	65.1611	66.9259	-66.955	-68.1441	-72.2956	-72.2392	-69.6616	-72.6343	-69.8662	-67.163	-72.5357	-67.132
75	64.5549	69.2728	67.5982	63.557	74.7927	68.8653	68.3914	60.3963	63.8221	65.8952	-66.253	-67.1667	-72.1301	-72.5971	-70.0263	-73.0793	-70.0887	-66.9207	-73.4807	-66.874
76	63.8546	68.4032	66.5883	62.3874	74.5872	67.4796	67.6489	59.3134	62.1225	64.4986	-65.2075	-65.8174	-71.4926	-72.5504	-69.8824	-73.1437	-69.867	-66.184	-73.9237	-66.2165
77	62.8506	67.1906	65.2662	60.8687	74.005	65.7935	66.5315	57.7951	60.0542	62.7469	-63.8239	-64.1042	-70.3991	-72.1068	-69.2454	-72.8001	-69.2023	-64.9823	-73.8697	-65.1572
78	61.5465	65.6547	63.6383	59.0233	73.0584	63.8261	65.0573	55.8621	57.6118	60.6523	-62.1069	-62.037	-68.8705	-71.2762	-68.1395	-72.0225	-68.0962	-63.3416	-73.3275	-63.6934
79	59.9429	63.8115	61.7068	56.8668	71.7436	61.5888	63.2432	53.5406	54.7928	58.2277	-60.0603	-59.6228	-66.9297	-70.0688	-66.592	-70.7919	-66.5509	-61.2801	-72.3104	-61.8211
80	58.0382	61.6729	59.4659	54.4082	70.0432	59.0867	61.1032	50.8642	51.6022	55.4864	-57.6868	-56.8693	-64.5975	-68.4931	-64.6281	-69.097	-64.5685	-58.808	-70.8345	-59.5345
81	55.8291	59.2456	56.9019	51.6515	67.9366	56.3311	58.6481	47.8711	48.0579	52.44	-54.9895	-53.7908	-61.8902	-66.5547	-62.2657	-66.9323	-62.151	-55.9306	-68.9148	-56.8264
82	53.3121	56.5308	53.9992	48.5977	65.4073	53.3422	55.8879	44.5976	44.1921	49.0998	-51.9724	-50.4095	-58.8167	-64.2562	-59.5172	-64.2996	-59.3005	-52.654	-66.5609	-53.6875
83	50.4829	53.5238	50.7447	45.2477	62.4451	50.1317	52.8329	41.0718	40.0491	45.4776	-48.6411	-46.7525	-55.3815	-61.601	-56.3934	-61.2078	-56.0201	-48.9891	-63.7749	-50.1084
84	47.3354	50.2135	47.1271	41.6052	59.041	46.6921	49.4969	37.3176	35.6815	41.5876	-45.005	-42.8508	-51.5918	-58.5959	-52.9036	-57.6718	-52.3163	-44.9547	-60.5503	-46.0885
85	43.8599	46.5856	43.1371	37.6795	55.1846	43.0046	45.8979	33.3649	31.1519	37.4469	-41.0792	-38.7383	-47.4634	-55.2519	-49.0541	-53.7127	-48.2017	-40.5791	-56.87	-41.6449
86	40.0466	42.6302	38.7733	33.4901	50.8687	39.0555	42.058	29.2563	26.5373	33.0794	-36.8883	-34.4495	-43.0278	-51.5845	-44.8486	-49.3579	-43.6975	-35.9062	-52.7079	-36.8179
87	35.8927	38.3504	34.055	29.0732	46.0942	34.8476	38.0055	25.0455	21.9324	28.522	-32.4723	-30.0217	-38.3412	-47.6142	-40.2955	-44.641	-38.8406	-31.0037	-48.0391	-31.6787
88	31.4159	33.7726	29.0336	24.4908	40.8747	30.4028	33.7793	20.7964	17.4481	23.8347	-27.8959	-25.5032	-33.4952	-43.3672	-35.4205	-39.6055	-33.6936	-25.9697	-42.8597	-26.3393
89	26.6659	28.957	23.8009	19.8362	35.2477	25.7721	29.4335	16.5862	13.2033	19.111	-23.2567	-20.9657	-28.6233	-38.8803	-30.2751	-34.3099	-28.3524	-20.9325	-37.2097	-20.9572
90	21.7337	24.0043	18.4888	15.2359	29.2938	21.0501	25.0409	12.5116	9.3153	14.4803	-18.689	-16.5178	-23.894	-34.2108	-24.9441	-28.833	-22.9502	-16.0512	-31.1895	-15.727
91	16.7518	19.0564	13.2637	10.8488	23.1557	16.3779	20.6979	8.68644	5.89155	10.0989	-14.358	-12.3131	-19.4901	-29.4448	-19.5586	-23.2814	-17.6584	-11.512	-24.9734	-10.867
92	11.8895	14.2904	8.32124	6.85721	17.043	11.934	16.524	5.23576	3.02763	6.13162	-10.445	-8.54529	-15.5823	-24.6977	-14.3099	-17.7995	-12.684	-7.51783	-18.8137	-6.60487
93	7.34529	9.90604	3.88171	3.44902	11.2236	7.9206	12.6552	2.28961	0.80344	2.73011	-7.13082	-5.4288	-12.3173	-20.1092	-9.45176	-12.5766	-8.2554	-4.26483	-13.0269	-3.15329
94	3.33455	6.10503	0.17739	0.79273	6.00282	4.54099	9.23277	-0.03057	-0.72673	0.01542	-4.57447	-3.16552	-9.81592	-15.8363	-5.27532	-7.84791	-4.59888	-1.91002	-7.96344	-0.67415
95	0.06736	3.06529	-2.57935	-0.98972	1.68271	1.96895	6.39066	-1.63536	-1.54851	-1.93321	-2.88959	-1.89979	-8.1682	-12.0462	-2.05846	-3.8803	-1.90644	-0.53742	-3.96172	0.75367
96	-2.28487	0.91243	-4.24418	-1.84556	-1.49801	0.31492	4.24137	-2.49337	-1.70415	-3.08676	-2.11927	-1.67422	-7.41776	-8.90523	0.00262	-0.93631	-0.300818	-0.13218	-1.28685	1.15207
97	-3.6272	-0.30622	-4.78669	-1.80478	-3.42043	-0.40042	2.85979	-2.64668	-1.30165	-3.47346	-2.21865	-2.4084	-7.54082	-6.56006	0.85455	0.78633	0.19881	-0.57453	-0.06034	0.64378
98	-3.97287	-0.63877	-4.31542	-0.9791	-4.11967	-0.25473	2.2659	-2.21476	-0.5036	-3.18395	-3.05486	-3.91805	-8.43594	-5.11074	0.61367	1.22464	-0.302173	-1.65836	-0.20593	-0.56904
99	-3.45204	-0.22655	-3.06586	0.45691	-3.78245	0.58731	2.41197	-1.37975	0.50454	-2.36531	-4.43016	-5.96402	-9.9354	-4.58505	-0.46128	0.49147	-1.58482	-3.13269	-1.44464	-2.25342
100	-2.28903	0.72269	-1.34774	2.29716	-2.71303	1.90709	3.18377	-0.34784	1.55902	-1.19553	-6.12632	-8.3136	-11.8424	-4.9209	-2.05275	-1.14027	-3.36873	-4.7596	-3.36519	-4.20986

## Sheet: Knee Flexion Moments (Nm)
Stride (%)	Con 1	Con 2	Con 3	Con 4	Con 5	Con 6	Con 7	Con 8	Con 9	Con 10	TTA 1	TTA 2	TTA 3	TTA 4	TTA 5	TFA 1	TFA 2	TFA 3	TFA 4	TFA 5
0	-10.1467	-13.1211	-15.8416	-7.76423	-20.4619	-5.55033	-15.0995	-6.6745	-9.59653	-18.2168	-30.1501	-2.20167	-4.33782	-1.08631	-23.616	-16.5875	-19.3721	-12.5869	-31.1516	-19.3754
1	-13.0855	-16.435	-19.671	-9.5255	-27.464	-6.30812	-14.6745	-9.20257	-14.4583	-17.7301	-47.6013	-22.8451	-13.3842	-7.07977	-58.7047	-32.4776	-43.5474	-27.9819	-79.9003	-40.491
2	-14.0045	-17.4548	-21.4738	-9.91627	-31.1684	-4.35455	-14.065	-9.88052	-16.7948	-14.6994	-37.2659	-27.5393	-24.6873	-21.0831	-48.4876	-39.3037	-39.391	-27.0434	-64.756	-33.331
3	-12.0863	-15.0962	-20.1139	-7.74528	-30.4356	1.28873	-12.6122	-7.97175	-15.4497	-8.55267	-17.4588	15.2857	-10.9933	-21.6271	-17.1257	-3.7821	-4.75336	-6.8036	-8.82851	-0.334481
4	-7.96053	-9.87504	-15.8447	-2.50988	-26.3656	9.69276	-9.5698	-3.85832	-10.8592	-0.370232	3.70988	39.5881	15.5273	-12.0108	-14.5549	23.477	13.1333	5.20468	8.34273	17.0203
5	-2.78777	-3.02662	-9.73846	5.52862	-20.4581	19.5196	-4.81607	1.71985	-4.12536	8.91963	19.7122	51.0602	27.8691	-3.56973	-3.2639	30.673	14.1302	11.4207	-5.16299	18.1316
6	2.64387	4.49861	-2.72785	15.6838	-13.3488	29.9555	1.06182	8.09323	3.76098	19.1446	25.6546	72.2454	34.4143	14.617	12.8818	40.7247	22.8407	17.9577	3.40433	27.843
7	8.05586	12.1829	4.75223	27.1145	-5.03179	40.2602	7.43122	14.6405	12.0083	30.2543	38.3785	89.7503	46.2933	22.1879	23.0967	60.8018	34.1717	25.3847	12.9504	38.0687
8	13.374	19.6545	12.4877	38.8625	4.51203	49.374	14.0079	20.7409	19.9435	41.8099	51.5768	105.908	59.5868	20.4042	35.4904	86.9029	45.495	30.7286	17.9193	49.505
9	18.5	26.5743	20.1791	49.936	15.1356	56.2097	20.6329	25.8693	27.1217	52.9966	68.054	121.663	69.85	23.8416	45.3925	95.3787	51.308	35.5826	21.026	56.0517
10	23.2817	32.6648	27.4213	59.4978	26.6059	60.1126	27.0557	29.7235	33.3757	62.8902	80.7622	129.804	75.2486	31.2658	54.5724	105.456	56.3235	40.5187	23.75	59.0953
11	27.531	37.7626	33.8762	66.9636	38.6047	61.0995	32.9969	32.2367	38.6015	70.7415	88.3869	133.431	82.1981	36.1251	62.7335	114.248	62.5004	44.6352	30.7742	64.8024
12	31.0176	41.8231	39.3587	71.975	50.6472	59.7289	38.222	33.4781	42.556	76.1524	92.5823	134.663	85.908	38.9718	66.8027	119.784	65.7869	46.6145	34.74	67.3448
13	33.5277	44.8287	43.7416	74.3591	62.0653	56.7471	42.5159	33.5608	44.9428	79.1067	95.8166	131.126	87.9676	39.3357	68.5904	121.062	65.9615	45.3932	37.4313	66.5631
14	34.9693	46.7219	46.8852	74.1421	72.1496	52.8007	45.6815	32.6149	45.6233	79.8683	94.0446	124.373	87.9344	39.3101	69.0199	119.397	64.2982	42.3222	39.9302	63.6853
15	35.3991	47.4404	48.6761	71.5703	80.3631	48.3305	47.5989	30.7885	44.6985	78.834	88.8386	114.754	85.8499	39.5378	67.7331	114.444	61.5074	39.5095	41.4463	59.6275
16	34.9684	46.983	49.0783	67.0642	86.4518	43.6026	48.2678	28.2389	42.451	76.3947	81.7175	103.303	81.9406	39.0177	64.9951	107.166	57.4708	36.526	42.0955	53.7366
17	33.8564	45.4496	48.1543	61.1226	90.392	38.7897	47.7866	25.1186	39.2419	72.8368	72.1489	90.9758	76.4341	38.3068	61.0327	99.1225	53.2037	34.1726	42.4725	47.1189
18	32.2288	43.0321	46.0577	54.2439	92.2674	34.0282	46.3006	21.571	35.4252	68.3313	62.4015	78.726	69.8975	36.9212	56.2564	90.6412	48.7015	32.0917	41.8877	40.3684
19	30.2231	39.9651	42.9984	46.8884	92.1933	29.4294	43.9715	17.7348	31.2935	63.0009	52.6001	67.1692	62.7856	35.2071	51.1086	81.7708	44.1675	30.1297	41.2753	33.6631
20	27.9462	36.4772	39.2077	39.4648	90.3109	25.0717	40.9757	13.7503	27.0516	56.9934	42.7177	56.6613	55.6147	33.3897	46.1935	73.0262	39.7868	28.3275	39.9186	27.7081
21	25.4813	32.7639	34.9178	32.3139	86.8052	20.9959	37.5019	9.75936	22.8298	50.512	33.8684	48.3081	48.7753	31.4506	41.2745	64.5508	35.5592	26.2025	38.1695	22.6724
22	22.9014	28.9819	30.3469	25.6829	81.9085	17.213	33.7403	5.88425	18.7195	43.8041	25.9898	40.9635	42.2627	29.4213	36.8122	56.8937	31.9086	24.4173	36.3394	18.7052
23	20.2757	25.2519	25.6928	19.7126	75.8954	13.7227	29.8689	2.19728	14.7926	37.1331	19.3804	34.7918	36.1746	27.5052	33.0225	49.9619	28.7065	22.9909	34.5581	15.3394
24	17.6648	21.6639	21.1325	14.4514	69.0752	10.5325	26.0448	-1.28528	11.1056	30.7414	14.3563	29.6293	30.6994	25.9984	29.845	43.98	25.7325	21.4504	32.5744	12.3547
25	15.1151	18.2818	16.82	9.88286	61.7738	7.66294	22.3968	-4.57515	7.70087	24.8104	10.4023	25.4663	26.0279	24.5362	27.1136	38.4321	23.0726	20.092	30.7794	9.80834
26	12.6558	15.1467	12.8737	5.95282	54.3075	5.13468	19.0193	-7.67644	4.60272	19.4427	7.57987	21.9325	22.1414	23.1373	24.9121	33.6388	20.6968	18.8663	29.125	7.47468
27	10.3005	12.2767	9.36569	2.58687	46.9629	2.94479	15.9694	-10.57	1.81223	14.6681	6.06923	19.2117	18.8724	21.8308	22.8162	29.549	18.6024	17.6401	27.7964	5.39297
28	8.05122	9.66443	6.32101	-0.2964	39.9793	1.05556	13.2686	-13.2195	-0.689683	10.4552	5.03552	16.7823	16.1777	20.5311	20.769	25.5056	16.5935	16.6431	26.1195	3.55689
29	5.90454	7.28017	3.72674	-2.77188	33.5262	-0.593509	10.9123	-15.5883	-2.93212	6.72345	4.43779	14.6694	14.0249	19.5518	19.112	21.9766	14.6901	15.6876	24.48	1.66422
30	3.85731	5.08673	1.54485	-4.9004	27.688	-2.06192	8.8803	-17.654	-4.95053	3.36413	4.50824	13.2223	12.2401	18.5197	17.6257	18.8498	12.8902	14.6123	22.9921	-0.127199
31	1.91115	3.05821	-0.274366	-6.73563	22.4739	-3.38883	7.14392	-19.4127	-6.78907	0.259896	4.93275	11.5312	10.9101	17.1549	16.2031	15.7931	11.0939	13.1865	21.4794	-1.57537
32	0.0749184	1.19041	-1.77793	-8.33748	17.8502	-4.58613	5.6686	-20.8742	-8.49626	-2.69423	5.39851	9.06574	9.88697	15.627	14.8773	12.4563	9.38908	11.8427	20.0097	-2.65224
33	-1.63597	-0.501677	-2.99932	-9.77346	13.7744	-5.64582	4.41304	-22.0625	-10.1097	-5.56083	5.92877	6.80205	9.17876	14.1155	13.5758	8.90838	7.78331	10.4429	18.3331	-3.07078
34	-3.20511	-1.99581	-3.95775	-11.102	10.2144	-6.55582	3.32938	-23.0174	-11.6363	-8.33953	6.55778	4.13725	8.71533	12.5211	12.1719	5.3248	6.31782	9.32093	16.6292	-3.27245
35	-4.62448	-3.27411	-4.66785	-12.3517	7.14869	-7.31137	2.36671	-23.781	-13.0424	-10.9722	7.68846	1.66552	8.54597	10.9851	10.5998	1.28439	4.88816	8.2551	15.1104	-3.23784
36	-5.9006	-4.32402	-5.15315	-13.5132	4.55788	-7.91448	1.47756	-24.3799	-14.2674	-13.3629	9.18197	-0.623386	8.62786	9.42478	9.1396	-2.55428	3.30712	7.03073	13.7266	-3.75938
37	-7.05271	-5.12983	-5.45485	-14.5478	2.41567	-8.36623	0.623469	-24.8191	-15.2475	-15.4017	10.8168	-2.55689	8.90718	7.35221	7.42973	-6.604	1.26761	5.65316	12.0574	-5.30564
38	-8.10554	-5.66567	-5.62878	-15.4023	0.683471	-8.65959	-0.22197	-25.0861	-15.923	-16.9858	12.5983	-4.0686	9.31853	5.03083	5.60437	-10.1006	-0.771394	4.49557	10.5493	-7.54448
39	-9.08052	-5.89594	-5.72881	-16.0188	-0.68826	-8.77088	-1.07202	-25.155	-16.2324	-18.0263	14.6372	-5.11188	9.69189	2.72858	4.01838	-13.2289	-2.79776	3.51378	8.724	-9.95342
40	-9.98468	-5.77928	-5.78133	-16.333	-1.7478	-8.64714	-1.92532	-24.9947	-16.1123	-18.4344	17.0222	-5.60402	10.0769	0.365379	2.55167	-16.0927	-4.58347	2.92118	6.80883	-12.0844
41	-10.7963	-5.27165	-5.7616	-16.2714	-2.52048	-8.19723	-2.76157	-24.5769	-15.5019	-18.0991	19.5186	-5.41835	10.2708	-1.6958	1.36925	-18.8876	-6.09173	2.67383	4.7384	-13.5999
42	-11.4521	-4.32929	-5.58324	-15.751	-2.98411	-7.29578	-3.53518	-23.8772	-14.3484	-16.8826	21.8437	-4.90705	10.4976	-3.35573	0.672683	-21.9504	-7.16146	2.64782	2.62005	-13.6932
43	-11.8428	-2.91477	-5.10801	-14.6859	-3.05462	-5.80343	-4.17112	-22.8709	-12.6125	-14.6436	24.3715	-3.92503	10.564	-4.9497	0.6412	-24.6275	-8.02855	2.52767	0.323792	-13.1569
44	-11.8259	-1.00658	-4.17449	-13.004	-2.59556	-3.59803	-4.56664	-21.5298	-10.2719	-11.278	27.1676	-3.00333	10.7586	-6.57859	1.28382	-26.7964	-8.42538	2.33892	-1.88475	-11.3921
45	-11.2565	1.39527	-2.63631	-10.6696	-1.4515	-0.605514	-4.60031	-19.8324	-7.32437	-6.77229	30.467	-1.97978	10.9173	-7.44452	2.02659	-28.3498	-8.5476	2.42864	-3.9527	-9.50507
46	-10.0289	4.27285	-0.399364	-7.7031	0.510351	3.17334	-4.14955	-17.7792	-3.79581	-1.25183	34.058	-0.486267	11.3026	-7.83583	3.33984	-29.9335	-8.50768	2.66168	-5.92517	-7.27523
47	-8.11206	7.59252	2.54479	-4.18426	3.36555	7.63627	-3.1154	-15.4007	0.235794	5.00387	38.1368	0.74628	11.6952	-7.97247	4.90669	-31.1703	-8.13614	3.16671	-7.12944	-4.96835
48	-5.56634	11.2955	6.09017	-0.238591	7.10548	12.5564	-1.4496	-12.7521	4.61456	11.5949	42.5761	2.71525	12.3173	-8.54223	6.50708	-30.5246	-7.26571	3.90888	-7.77685	-2.86115
49	-2.54608	15.2803	10.0024	3.98584	11.6155	17.5733	0.823514	-9.8927	9.10092	18.0615	46.7528	5.13425	13.1796	-9.29264	8.34826	-28.9384	-6.00439	4.60039	-7.74183	-0.48062
50	0.714135	19.3908	13.9289	8.33118	16.6667	22.2076	3.59944	-6.85603	13.3867	23.9377	51.4117	7.94964	14.3663	-9.76998	9.85167	-25.7785	-4.29586	5.35539	-7.11653	1.88846
51	3.93414	23.4198	17.4328	12.6237	21.9332	25.9129	6.70354	-3.64766	17.1234	28.7875	55.6547	11.2697	15.904	-10.0936	11.993	-21.4061	-1.92435	6.45506	-5.8295	4.85542
52	6.83855	27.1242	20.0592	16.6603	27.0368	28.1881	9.91172	-0.318272	19.973	32.2446	58.777	14.296	17.6483	-9.7358	13.7645	-16.1228	1.0487	8.12802	-3.6977	8.05877
53	9.2038	30.2309	21.4469	20.2065	31.5898	28.7495	12.9754	2.96508	21.6849	34.0706	61.0234	18.3993	19.4048	-8.27407	15.737	-10.2925	4.25636	9.50116	-0.558458	11.3196
54	10.8909	32.4436	21.4474	23.0173	35.2092	27.6898	15.6523	5.97193	22.1632	34.2276	60.2989	21.9554	21.0044	-5.86331	17.7468	-3.49014	7.98478	11.9872	3.24022	14.0781
55	11.8591	33.487	20.1651	24.8731	37.5139	25.4673	17.7437	8.52434	21.465	32.9116	58.8252	24.5819	22.425	-2.77803	19.9524	3.15396	11.6304	14.7612	8.02937	15.7163
56	12.1456	33.1888	17.8742	25.6157	38.1539	22.6385	19.1261	10.5304	19.7028	30.4586	56.3451	26.3409	23.4185	-0.0726575	22.3386	9.43001	15.1281	18.2052	13.3696	16.0535
57	11.7974	31.5427	14.881	25.1621	36.9185	19.4915	19.7503	11.9093	16.9289	27.1389	53.3627	23.8929	23.1815	2.00598	24.2645	14.4118	18.2059	21.7017	19.0944	15.5458
58	10.8025	28.7029	11.4402	23.4819	33.8984	15.9424	19.6	12.5056	13.1697	23.0625	47.947	20.5975	21.0538	3.82712	25.7746	17.4491	20.5725	24.8291	24.2326	14.7353
59	9.13178	24.9262	7.77542	20.5919	29.5796	11.8382	18.6416	12.1319	8.64325	18.3443	41.1118	15.0318	18.1506	5.23176	26.7656	18.0957	21.9241	27.2809	27.4318	14.1227
60	6.89717	20.52	4.15695	16.6551	24.7052	7.36449	16.8381	10.7413	3.93183	13.336	32.5272	12.4243	15.58	6.46777	25.7743	17.1616	21.3599	28.1556	28.5576	11.231
61	4.44648	15.8265	0.925833	12.1147	19.9021	3.15244	14.2476	8.55557	-0.134183	8.63726	23.4865	9.49947	13.3898	6.24207	22.766	12.9094	18.8271	28.2613	27.4019	6.32697
62	2.25868	11.2267	-1.57128	7.64722	15.3737	-0.0215745	11.1137	6.01751	-2.84003	4.86764	14.9414	6.05217	10.459	4.90935	19.5099	6.88898	15.7718	26.474	26.5715	2.59156
63	0.735934	7.14902	-3.08406	3.9129	10.9772	-1.69438	7.84083	3.60517	-3.90813	2.42013	9.76719	4.94574	7.2265	2.55828	15.554	0.532552	12.2128	23.617	23.0246	0.31484
64	0.0540752	4.04105	-3.54957	1.33324	6.59317	-1.93724	4.88586	1.65509	-3.54676	1.36106	4.89953	-1.15498	5.58907	1.18667	9.70154	-4.22551	8.8642	18.3456	18.9555	0.51768
65	0.137839	2.21705	-3.11668	0.0206692	2.39729	-1.20379	2.64296	0.332114	-2.27141	1.4556	2.63536	0.775486	4.39915	0.343843	6.23988	-5.69714	6.39092	13.7532	13.9708	1.36131
66	0.739334	1.64987	-2.08261	-0.200674	-1.1807	-0.0409295	1.33466	-0.299768	-0.677747	2.25762	3.33542	2.69856	5.40809	-0.434377	1.51449	-5.14364	4.513	9.63245	8.95866	2.37457
67	1.55336	1.9524	-0.796743	0.286159	-3.71454	1.10509	0.939486	-0.273068	0.73451	3.25446	4.33993	4.27229	-0.0834961	-0.49313	-0.657337	-4.09698	2.72206	5.99	3.39213	3.22615
68	2.31116	2.5962	0.422789	1.03688	-5.017	1.95767	1.22328	0.226799	1.66158	4.02534	5.1176	4.88922	2.63206	-0.48738	0.858573	-2.64414	1.77378	2.51154	1.93533	3.70011
69	2.83333	3.14845	1.34873	1.69233	-5.18345	2.40173	1.85441	0.89519	2.0149	4.33882	5.42294	4.66012	4.76831	-0.327743	2.94781	-1.01355	1.98647	2.65146	1.10524	3.73997
70	3.04499	3.37657	1.87311	2.05523	-4.48595	2.43996	2.51883	1.43799	1.87534	4.16098	5.22171	3.97207	6.23584	-0.04234	4.9377	0.530404	2.96843	3.37659	3.80045	3.4353
71	2.96245	3.2363	2.00213	2.08859	-3.26166	2.14314	2.99102	1.67867	1.41416	3.59862	4.60595	3.17477	6.63396	0.298994	6.13736	1.75518	3.65848	4.07185	5.72039	2.9216
72	2.66257	2.80336	1.82446	1.86238	-1.84744	1.60951	3.15984	1.58561	0.813383	2.81811	3.74592	2.43342	6.12803	0.57321	6.34667	2.49843	3.92769	4.43265	6.67178	2.32185
73	2.24625	2.19741	1.46691	1.4839	-0.535868	0.937153	3.0185	1.2349	0.207791	1.97464	2.80859	1.75883	5.05861	0.668554	5.80213	2.71413	3.69542	4.26832	6.46506	1.72233
74	1.80589	1.52685	1.05237	1.04286	0.46217	0.207198	2.63209	0.745414	-0.342302	1.17156	1.90551	1.07514	3.80305	0.533066	4.90733	2.52779	3.06331	3.57578	5.4332	1.15858
75	1.40402	0.862642	0.670918	0.585958	1.04107	-0.523604	2.09707	0.221963	-0.847746	0.45288	1.0839	0.295857	2.60204	0.175842	3.97487	2.14703	2.22666	2.52937	4.07013	0.631902
76	1.06571	0.236137	0.367575	0.118969	1.20025	-1.22221	1.50528	-0.274498	-1.36434	-0.180773	0.347498	-0.605179	1.56179	-0.313421	3.1326	1.73316	1.35947	1.36519	2.71006	0.145554
77	0.782969	-0.349716	0.143932	-0.375491	1.01973	-1.8731	0.920603	-0.729503	-1.95658	-0.748895	-0.311602	-1.5779	0.676576	-0.821605	2.37132	1.35563	0.559658	0.287666	1.48757	-0.322907
78	0.526781	-0.90584	-0.0320647	-0.918076	0.620916	-2.47074	0.371214	-1.16065	-2.66665	-1.27517	-0.917527	-2.52654	-0.104047	-1.27083	1.63599	0.963426	-0.148972	-0.585667	0.406907	-0.78564
79	0.261201	-1.44578	-0.212059	-1.51946	0.124769	-3.01412	-0.144669	-1.59796	-3.50057	-1.78458	-1.49813	-3.39761	-0.822479	-1.62659	0.897016	0.441794	-0.810111	-1.27093	-0.582684	-1.26135
80	-0.0457136	-1.98047	-0.451253	-2.1766	-0.3826	-3.50516	-0.645917	-2.06789	-4.43359	-2.30968	-2.09333	-4.1822	-1.51563	-1.89788	0.15678	-0.312729	-1.49043	-1.88159	-1.49517	-1.77587
81	-0.417424	-2.51897	-0.793736	-2.87661	-0.868389	-3.95227	-1.15576	-2.58512	-5.42738	-2.89778	-2.73188	-4.88752	-2.21448	-2.12725	-0.572856	-1.32162	-2.24662	-2.52074	-2.35939	-2.37656
82	-0.871483	-3.07345	-1.26411	-3.60453	-1.35283	-4.37693	-1.69453	-3.15295	-6.44848	-3.61263	-3.42553	-5.52607	-2.94829	-2.35567	-1.27655	-2.56054	-3.12046	-3.24826	-3.24411	-3.10971
83	-1.42719	-3.66581	-1.86885	-4.35153	-1.89623	-4.81832	-2.27953	-3.76928	-7.48037	-4.52953	-4.16685	-6.13808	-3.75151	-2.62926	-1.97059	-3.96576	-4.12188	-4.05992	-4.1948	-4.02395
84	-2.1149	-4.33392	-2.60666	-5.12281	-2.5823	-5.33218	-2.93044	-4.43459	-8.52746	-5.72579	-4.95867	-6.77152	-4.70462	-2.97551	-2.67507	-5.42433	-5.24514	-4.9428	-5.24929	-5.16242
85	-2.98347	-5.13501	-3.48371	-5.94418	-3.50066	-5.98577	-3.67629	-5.15898	-9.61281	-7.26914	-5.84685	-7.50301	-5.86754	-3.42964	-3.41531	-6.87949	-6.50746	-5.92175	-6.42668	-6.58067
86	-4.10266	-6.14374	-4.52811	-6.8648	-4.7298	-6.85324	-4.55927	-5.96578	-10.7705	-9.20578	-6.92226	-8.42073	-7.2406	-4.00348	-4.23923	-8.28704	-7.92412	-7.0447	-7.73918	-8.30042
87	-5.5577	-7.44419	-5.79703	-7.9524	-6.32775	-8.0121	-5.63253	-6.88983	-12.0324	-11.5494	-8.33356	-9.65005	-8.82315	-4.68469	-5.24984	-9.58682	-9.51344	-8.36822	-9.2287	-10.3354
88	-7.43399	-9.11714	-7.36973	-9.27876	-8.33794	-9.53566	-6.95186	-7.9687	-13.4118	-14.2725	-10.2747	-11.3199	-10.6791	-5.43572	-6.5846	-10.7649	-11.302	-9.93794	-10.9851	-12.6757
89	-9.79247	-11.2229	-9.32217	-10.8959	-10.8048	-11.4743	-8.56286	-9.22444	-14.8869	-17.301	-12.9172	-13.5884	-12.7891	-6.23506	-8.43274	-11.9012	-13.3546	-11.7893	-13.2281	-15.3008
90	-12.6383	-13.7767	-11.685	-12.806	-13.7787	-13.8237	-10.4841	-10.6369	-16.3873	-20.5082	-16.322	-16.4826	-15.0196	-7.10716	-11.0439	-13.1804	-15.7349	-13.9083	-16.2099	-18.1469
91	-15.8869	-16.717	-14.3939	-14.9325	-17.2873	-16.4863	-12.687	-12.1176	-17.7828	-23.7088	-20.3831	-19.9265	-17.2596	-8.08767	-14.6278	-14.8916	-18.4458	-16.1797	-20.1246	-21.0257
92	-19.3339	-19.8696	-17.2473	-17.1028	-21.2622	-19.2402	-15.075	-13.4999	-18.8803	-26.6487	-24.7489	-23.6712	-19.348	-9.19855	-19.1379	-17.3018	-21.343	-18.3505	-24.9297	-23.5761
93	-22.6395	-22.9234	-19.8962	-19.0527	-25.4419	-21.7319	-17.4703	-14.5566	-19.4361	-28.998	-28.8102	-27.2209	-21.0211	-10.4558	-24.093	-20.5692	-24.089	-20.0205	-30.1956	-25.2798
94	-25.3435	-25.4371	-21.8869	-20.4607	-29.3016	-23.512	-19.6161	-15.0474	-19.195	-30.366	-31.765	-29.852	-21.9027	-11.8669	-28.6284	-24.5624	-26.1409	-20.7284	-34.9765	-25.5357
95	-26.9288	-26.8989	-22.7678	-21.0079	-32.071	-24.1194	-21.205	-14.7859	-17.9574	-30.3609	-32.8586	-30.7636	-21.5539	-13.3603	-31.6428	-28.6386	-26.8169	-20.0992	-37.9122	-23.8056
96	-26.9336	-26.8425	-22.2338	-20.4535	-32.884	-23.2004	-21.9369	-13.7106	-15.6559	-28.6974	-31.6091	-29.3797	-19.6614	-14.7172	-32.0119	-31.5738	-25.4827	-17.9854	-37.5673	-19.9011
97	-25.0913	-24.9907	-20.2522	-18.7021	-31.0455	-20.6249	-21.5991	-11.9302	-12.4065	-25.3186	-27.8964	-25.6286	-16.1926	-15.5444	-29.0382	-31.8434	-21.849	-14.5939	-33.0402	-14.2494
98	-21.4448	-21.3736	-17.0951	-15.8434	-26.3177	-16.5478	-20.1513	-9.71049	-8.49097	-20.4622	-21.9782	-20.0041	-11.4821	-15.3992	-23.0864	-28.3427	-16.2812	-10.495	-24.5888	-8.01692
99	-16.3815	-16.3645	-13.2286	-12.1498	-19.1068	-11.3797	-17.7799	-7.36129	-4.25263	-14.6076	-15.0826	-13.4913	-6.39896	-13.7473	-15.7274	-21.2475	-9.9487	-6.53092	-14.0152	-2.87939
100	-10.566	-10.6135	-9.10301	-8.0322	-10.4623	-5.68226	-14.8872	-5.06665	0.0397205	-8.32117	-7.81402	-7.59366	-2.38857	-11.236	-9.15732	-11.7784	-4.37138	-3.46562	-4.32336	-0.269479

## Sheet: Knee Adduction Moments (Nm)
Stride (%)	Con 1	Con 2	Con 3	Con 4	Con 5	Con 6	Con 7	Con 8	Con 9	Con 10	TTA 1	TTA 2	TTA 3	TTA 4	TTA 5	TFA 1	TFA 2	TFA 3	TFA 4	TFA 5
0	0.768091	2.95158	1.40749	-1.05621	-0.0779149	2.55837	-0.233008	1.45596	1.65553	5.58948	-4.91547	7.57128	1.22705	2.31814	-5.28085	-5.75335	-1.89401	-0.323099	-3.88993	0.427893
1	1.22671	3.76465	1.23204	0.349275	3.09814	0.374463	-1.04746	0.359199	-1.34059	4.51154	-9.65205	7.32834	1.45526	0.191837	-5.86509	-8.27505	-5.77571	1.84116	-18.4268	-3.31874
2	1.34857	3.76703	0.422229	1.27855	4.50263	-1.72583	-1.96663	-0.609087	-4.87552	3.05784	-4.65302	-7.26822	-1.27482	-4.51993	-13.9052	-14.9077	-7.73845	-0.849371	-17.181	-3.50101
3	1.1358	2.82169	-1.29147	1.38702	3.5404	-3.4036	-2.85862	-1.01769	-8.89193	1.45874	-0.57688	-16.3582	-4.25852	-7.33967	-14.4655	-8.63557	-2.49445	-0.813029	-2.81015	0.12451
4	0.935605	1.57257	-3.68219	0.660165	0.969137	-4.21019	-3.36405	-0.315748	-12.6688	0.550481	1.30256	-15.1171	-4.53052	-9.68833	-9.52198	0.0615791	0.414486	-2.97444	-0.45536	4.68707
5	1.21497	1.06079	-6.13775	-0.429639	-1.74473	-3.90002	-3.04148	1.82691	-15.1336	1.36016	3.52771	-7.50376	0.227785	-11.6093	-0.203292	1.61967	1.24587	-3.02896	-3.84536	8.70318
6	2.29258	2.12292	-7.9535	-1.12721	-3.2555	-2.57724	-1.58688	5.34233	-15.4086	4.52366	18.5617	-1.05883	6.4746	-4.12684	10.8083	0.542755	4.86628	1.75689	0.732113	13.3697
7	4.20293	4.98885	-8.59638	-0.934511	-2.86527	-0.600476	1.01312	9.80997	-13.2744	9.85383	38.0228	0.0144135	10.1965	1.65262	15.1689	13.3754	13.5748	8.24863	7.77384	22.3133
8	6.73098	9.23145	-7.86849	0.0831416	-0.631619	1.61898	4.47464	14.6264	-9.23198	16.3515	37.3168	3.19032	14.4045	4.62426	21.6296	27.393	21.7526	14.3973	10.833	31.7228
9	9.56949	14.031	-5.93406	1.5761	2.93613	3.74839	8.34464	19.2088	-4.15975	22.7204	38.5665	14.0189	15.3873	8.43277	24.8614	28.4674	23.6632	19.66	11.8634	31.2106
10	12.4621	18.6108	-3.16841	3.2942	7.28824	5.52092	12.1878	23.1391	1.04663	27.9595	43.1821	14.9093	19.1364	11.9111	28.1146	30.0552	26.857	25.7141	17.0282	31.0387
11	15.2075	22.5398	0.000759296	5.09657	11.9342	6.71026	15.7053	26.2016	5.58697	31.5722	42.8701	13.3018	21.8531	12.6569	33.7818	33.8098	29.7741	29.7074	21.1549	31.349
12	17.5931	25.6869	3.08156	6.83177	16.3668	7.21744	18.7123	28.358	8.82627	33.4847	40.9927	15.4047	21.2465	11.5449	33.273	33.4145	28.2506	28.7303	20.9252	27.7503
13	19.4181	28.0064	5.52155	8.36852	20.1731	7.14872	21.0874	29.7175	10.4688	33.9532	37.7531	14.5814	21.2397	11.3739	31.0309	33.9609	25.6003	24.92	20.5754	22.824
14	20.5988	29.4538	6.90999	9.66059	23.1863	6.7533	22.8061	30.4925	10.6394	33.4517	35.6496	12.6909	20.9377	13.1853	30.3241	33.9193	23.3569	22.2739	19.9987	18.5728
15	21.2129	30.0498	7.1977	10.7364	25.4425	6.29224	23.9685	30.9258	9.7745	32.5164	35.026	11.5272	20.8789	15.3094	30.3185	34.0233	21.2668	19.9739	17.5304	15.625
16	21.4261	29.9336	6.72836	11.6304	27.0714	5.94422	24.7379	31.2068	8.44172	31.6209	34.5681	11.2338	21.467	16.1592	30.5327	34.1077	19.9954	18.8124	14.5208	14.5705
17	21.3926	29.3317	6.07782	12.3181	28.245	5.77684	25.2504	31.4172	7.16465	31.0978	33.6652	11.8438	22.0075	16.1543	30.1168	33.6245	19.3878	18.682	12.5713	14.3095
18	21.2096	28.4746	5.79681	12.7356	29.1304	5.77235	25.5677	31.5276	6.2943	31.0768	32.175	11.8367	22.3769	16.1781	28.8151	32.911	19.2798	19.1717	11.3596	14.7169
19	20.9226	27.5256	6.19103	12.8583	29.82	5.87237	25.6816	31.4433	5.97747	31.4557	29.4292	12.04	22.8149	16.0552	27.2653	32.2107	19.4995	20.1407	11.059	15.0985
20	20.5454	26.5555	7.2442	12.7293	30.2854	6.00787	25.5422	31.0731	6.19521	31.9447	25.9426	12.3736	22.8307	16.046	25.7815	31.7084	19.7619	21.114	11.6928	14.8693
21	20.0774	25.5628	8.68924	12.4191	30.4086	6.11451	25.0874	30.3877	6.79844	32.1807	22.2143	12.8885	22.0107	15.5062	24.4463	30.9039	19.5409	21.5129	12.5747	13.6736
22	19.5183	24.5158	10.1572	11.9821	30.0663	6.14619	24.2745	29.4403	7.53722	31.8639	19.1444	13.6454	20.3968	14.4169	22.427	29.8166	18.9027	21.2139	13.2695	12.1316
23	18.8808	23.402	11.3259	11.449	29.197	6.08312	23.1106	28.3499	8.13126	30.8779	16.7965	14.3003	18.3368	13.2216	20.4124	28.0326	17.9088	20.2276	13.7542	10.7202
24	18.1986	22.2644	12.0215	10.8426	27.8204	5.9248	21.6665	27.2626	8.37764	29.3563	14.4464	14.3434	16.3453	12.0902	18.5059	25.7651	16.7294	18.8475	14.1202	9.49806
25	17.5233	21.2001	12.2532	10.1878	26.0359	5.67317	20.0674	26.3118	8.23207	27.6431	12.6711	14.1806	14.9412	11.2651	16.8628	23.095	15.4801	17.7694	13.8384	8.4261
26	16.9107	20.3133	12.1721	9.51804	24.0159	5.32476	18.4615	25.5923	7.8127	26.1339	11.694	14.7238	14.0802	10.9087	15.7834	20.5234	14.4276	17.1192	13.0523	7.83056
27	16.4052	19.6595	11.9804	8.88347	21.9839	4.88202	16.9796	25.1516	7.32925	25.0905	10.8739	15.6569	13.566	10.774	15.0846	18.4193	13.675	17.0698	11.9046	7.53723
28	16.0313	19.2214	11.8412	8.35441	20.1585	4.36929	15.7037	24.9908	6.98182	24.5538	10.4098	17.0419	13.292	10.4784	14.7755	17.2708	13.2779	17.277	10.6813	7.57593
29	15.7973	18.9327	11.8318	8.00443	18.6832	3.83253	14.6559	25.0698	6.88474	24.393	10.5103	18.4873	12.9564	10.1978	14.7925	17.0241	13.2475	17.6258	10.1414	7.63497
30	15.7037	18.7245	11.9466	7.88266	17.59	3.32311	13.8123	25.3237	7.04858	24.4288	10.6657	19.4061	12.7786	9.62007	14.9352	16.9824	13.3593	17.9139	10.1877	7.70266
31	15.7484	18.5629	12.1352	7.9953	16.8215	2.88285	13.1296	25.6915	7.41218	24.5418	10.8858	19.8019	12.5866	9.07759	15.1744	17.2529	13.5348	18.0158	10.582	7.73832
32	15.9279	18.4606	12.3449	8.30757	16.2907	2.54043	12.5711	26.1397	7.88901	24.7185	11.2597	20.3242	12.4758	8.63485	15.7619	17.2006	13.5451	17.6869	10.7223	8.05211
33	16.2361	18.4644	12.5445	8.76112	15.9386	2.31563	12.1206	26.662	8.40117	25.0375	11.6974	21.2306	12.5083	8.63966	16.6815	17.8039	13.6677	17.1028	10.6558	8.70681
34	16.6659	18.6334	12.7257	9.29235	15.7612	2.22363	11.7821	27.2684	8.89752	25.6184	12.0123	22.6994	12.8231	8.57495	17.6774	17.7324	13.8537	16.5605	10.468	10.0481
35	17.2123	19.0167	12.8964	9.84236	15.8002	2.27808	11.5716	27.9794	9.35807	26.5632	12.2846	24.0516	13.2576	8.46047	18.7453	17.3293	14.0799	15.9371	10.1711	11.894
36	17.8805	19.6371	13.0757	10.3631	16.1128	2.49399	11.5095	28.8186	9.78484	27.9101	12.2505	25.4486	13.8325	8.15176	19.7399	17.5533	14.6489	15.5803	9.82871	14.2142
37	18.6906	20.4846	13.293	10.8275	16.7464	2.88617	11.6204	29.8018	10.1867	29.618	12.1105	26.8642	14.4362	8.53386	20.6809	17.697	15.4004	15.3609	9.47238	17.0552
38	19.6751	21.5268	13.5838	11.2403	17.7269	3.46103	11.9359	30.926	10.5689	31.5842	12.1602	28.4722	15.0642	9.48552	21.6336	18.0049	16.2825	15.5504	9.36522	19.633
39	20.8645	22.7333	13.9793	11.6379	19.0562	4.20603	12.4914	32.1627	10.9305	33.6733	12.5655	29.6361	15.7298	10.2181	22.8654	18.7931	17.0481	15.8498	9.2126	21.4311
40	22.2628	24.0943	14.4959	12.0725	20.712	5.07997	13.3119	33.4594	11.2655	35.7415	13.304	30.9895	16.3933	10.847	24.3887	19.6856	17.8896	16.7463	9.18961	22.71
41	23.8243	25.6124	15.1305	12.5869	22.6452	6.00942	14.3949	34.7483	11.5631	37.6532	14.066	31.4934	17.0858	10.927	25.9899	20.5697	18.6745	17.6641	9.50244	23.5644
42	25.4431	27.272	15.862	13.1952	24.7769	6.89747	15.7018	35.9552	11.8107	39.29	15.0555	31.069	17.5887	10.6103	27.5033	21.4426	19.4755	18.8717	10.0006	24.0582
43	26.9641	29.0102	16.6469	13.8764	26.9991	7.64266	17.1654	37.0076	11.9977	40.5492	16.2374	30.5017	18.1085	10.0222	28.7051	22.1647	20.0562	20.1712	10.3649	23.9193
44	28.2089	30.711	17.4062	14.5836	29.1837	8.16321	18.7063	37.8443	12.1169	41.3521	17.174	29.7666	18.5131	9.34365	29.4517	22.2539	20.3457	21.1832	10.8903	23.4248
45	29.009	32.225	18.014	15.2612	31.2007	8.4204	20.2464	38.4304	12.1569	41.6595	17.9671	28.8976	18.631	8.66465	29.9562	22.8541	20.626	21.7445	10.9727	23.3232
46	29.2367	33.3997	18.3058	15.8591	32.9352	8.42729	21.7094	38.7639	12.0905	41.4686	18.2157	28.3074	18.6679	7.63678	30.2573	24.6563	20.8949	21.1263	11.2063	23.5132
47	28.8295	34.1008	18.112	16.3323	34.291	8.23166	23.0142	38.8549	11.8686	40.7712	18.4216	27.0013	18.5652	6.3486	30.296	27.6705	21.4042	20.2368	11.5248	23.926
48	27.797	34.2164	17.2997	16.6277	35.1695	7.87825	24.0689	38.6825	11.418	39.4981	18.1557	25.6559	18.3984	5.04066	29.8146	30.1974	21.6351	19.278	11.215	24.2276
49	26.1965	33.6468	15.7917	16.6664	35.4318	7.36802	24.7719	38.1531	10.6405	37.5012	17.2348	23.8975	18.1686	3.37695	29.3479	31.4547	21.4793	18.5575	10.8033	23.9073
50	24.0906	32.2948	13.5627	16.3389	34.8701	6.63774	25.0144	37.0869	9.42434	34.6083	15.4696	21.872	17.8125	1.29707	28.5174	31.229	20.873	18.0695	10.2236	22.9448
51	21.5194	30.0723	10.647	15.5242	33.2334	5.58153	24.6837	35.2543	7.67737	30.7275	12.7429	19.1894	17.4293	-1.00278	27.4515	28.522	19.384	17.1162	9.60713	21.2007
52	18.5098	26.9328	7.17506	14.1252	30.3294	4.1135	23.6724	32.4681	5.37233	25.9354	9.33271	16.0506	16.7669	-3.20906	26.0317	24.4652	17.365	16.1566	8.94328	18.6318
53	15.1106	22.9214	3.40246	12.1075	26.1648	2.2423	21.8993	28.6869	2.59304	20.5061	5.84179	12.1057	15.8575	-5.41022	24.1277	20.6447	15.456	15.6209	8.24689	15.8555
54	11.4275	18.217	-0.306095	9.52226	21.0251	0.116821	19.3442	24.054	-0.425924	14.8726	2.79578	7.52159	14.5044	-7.08071	21.9388	17.3572	13.7606	15.6818	7.44899	12.8871
55	7.64444	13.1392	-3.53038	6.51637	15.4207	-1.9917	16.0863	18.8714	-3.28834	9.54156	1.26994	2.60202	12.3343	-8.58216	18.9554	13.9752	12.0727	15.9421	6.57806	9.84832
56	4.02399	8.11289	-5.86914	3.32606	9.92216	-3.7757	12.3324	13.5552	-5.5012	4.99393	0.467105	-2.97393	9.0476	-9.50653	15.1254	10.6201	10.1711	15.8422	5.02789	6.90825
57	0.880488	3.60072	-7.04444	0.251609	4.99083	-4.99662	8.41605	8.58329	-6.63924	1.59195	0.339604	-8.15579	4.75852	-9.77929	10.8651	6.79267	7.79646	14.9959	2.89043	3.87652
58	-1.48566	0.0155293	-7.02169	-2.38871	0.888913	-5.54788	4.74213	4.40399	-6.54437	-0.505465	-0.00104264	-12.2784	0.771263	-9.53539	6.46896	1.59586	4.6825	13.2314	0.343952	0.521305
59	-2.8949	-2.37385	-6.05867	-4.3195	-2.30511	-5.4611	1.68714	1.30872	-5.42534	-1.40437	-0.531153	-12.3357	-2.03952	-8.97838	2.46608	-3.92889	1.23561	10.5849	-2.33604	-2.71934
60	-3.38812	-3.52617	-4.60393	-5.37954	-4.59593	-4.87974	-0.504103	-0.65682	-3.77022	-1.46055	-0.59818	-11.2139	-3.76507	-7.39005	-0.599751	-7.6981	-1.75225	6.62098	-5.02594	-4.23287
61	-3.22482	-3.6543	-3.10259	-5.58256	-5.95898	-4.02099	-1.78167	-1.66794	-2.12366	-1.14733	-0.952977	-8.70028	-4.9678	-5.10756	-2.03988	-8.62966	-3.5407	2.45885	-7.56853	-3.54532
62	-2.75491	-3.14601	-1.86348	-5.12192	-6.334	-3.11885	-2.28738	-2.00733	-0.873796	-0.860411	-0.928549	-6.76109	-4.54978	-3.40947	-2.70766	-8.83141	-4.91977	-1.20813	-9.78309	-2.71361
63	-2.26362	-2.41359	-1.04145	-4.29586	-5.75195	-2.34361	-2.27941	-1.95061	-0.165066	-0.786245	-0.741469	-6.49823	-3.29756	-2.19269	-2.84387	-9.41874	-5.98673	-4.43697	-9.73339	-2.55076
64	-1.89828	-1.76693	-0.657995	-3.39253	-4.44948	-1.75115	-2.02059	-1.70797	0.0591308	-0.908763	-1.42917	-3.14784	-3.03857	-1.29634	-1.8899	-8.41145	-5.63807	-5.40501	-7.2267	-2.72168
65	-1.68673	-1.36029	-0.62378	-2.60245	-2.82929	-1.30992	-1.69257	-1.41546	-0.0366453	-1.11509	-1.37927	-3.42246	-2.9356	-0.840318	-1.19491	-7.43388	-5.25622	-5.78217	-5.47405	-2.87378
66	-1.59218	-1.20349	-0.783688	-1.99529	-1.30559	-0.963524	-1.37875	-1.14435	-0.263034	-1.30097	-1.15182	-3.29141	-2.7529	-0.557006	-0.895434	-6.16382	-4.72402	-5.76162	-4.27897	-2.76283
67	-1.5599	-1.21392	-0.976357	-1.55411	-0.163558	-0.669687	-1.10199	-0.917397	-0.465683	-1.41291	-0.699465	-2.90945	-2.12807	-0.338511	-1.24886	-4.70364	-3.8347	-5.00333	-3.00096	-2.41491
68	-1.54218	-1.28319	-1.08204	-1.23055	0.492767	-0.408525	-0.865359	-0.731996	-0.557486	-1.43911	-0.159525	-2.30275	-1.99896	-0.197168	-1.37891	-3.2909	-2.97625	-3.81768	-2.6632	-1.95592
69	-1.50576	-1.32673	-1.04542	-0.982327	0.706954	-0.176052	-0.670672	-0.579942	-0.521383	-1.38782	0.329922	-1.63821	-1.75019	-0.0203859	-1.68471	-2.03032	-2.32871	-3.13719	-2.41951	-1.50955
70	-1.43101	-1.30065	-0.872662	-0.782213	0.600084	0.0253844	-0.52169	-0.456281	-0.391158	-1.2729	0.652248	-1.03417	-1.42331	0.138833	-1.97249	-0.959488	-1.76909	-2.57253	-2.14541	-1.12947
71	-1.30971	-1.19665	-0.610512	-0.611985	0.311041	0.193552	-0.419928	-0.360185	-0.222501	-1.10796	0.779153	-0.527611	-1.06404	0.253204	-2.11044	-0.100424	-1.1737	-1.84524	-1.65062	-0.806684
72	-1.14349	-1.02971	-0.318835	-0.456372	-0.0392104	0.328513	-0.359382	-0.291671	-0.065927	-0.904779	0.759641	-0.101653	-0.741888	0.32492	-2.06899	0.526465	-0.612618	-1.11444	-1.05255	-0.517096
73	-0.941722	-0.825651	-0.0468374	-0.302494	-0.364126	0.432077	-0.325942	-0.247792	0.050499	-0.672311	0.67891	0.269306	-0.490432	0.377087	-1.89085	0.920285	-0.169148	-0.525931	-0.560226	-0.24598
74	-0.718151	-0.611029	0.180404	-0.142982	-0.61404	0.506576	-0.301996	-0.221434	0.125041	-0.415898	0.611734	0.598731	-0.301813	0.435632	-1.63836	1.10108	0.118069	-0.147524	-0.281881	0.0077161
75	-0.48694	-0.406743	0.363053	0.0212409	-0.769366	0.55432	-0.272865	-0.203068	0.174214	-0.137957	0.596541	0.894019	-0.172372	0.510275	-1.35011	1.11075	0.267326	0.0389536	-0.179138	0.232769
76	-0.259614	-0.226259	0.517764	0.181218	-0.829939	0.577894	-0.231223	-0.183764	0.218821	0.159255	0.635268	1.16598	-0.108566	0.591715	-1.03893	1.00173	0.325153	0.0975544	-0.145008	0.411409
77	-0.0437869	-0.0775395	0.665016	0.323662	-0.805706	0.580337	-0.177751	-0.157979	0.271678	0.469639	0.704381	1.43832	-0.105231	0.66479	-0.716189	0.830781	0.343694	0.0971002	-0.0921331	0.549597
78	0.156377	0.0340936	0.819157	0.436839	-0.711952	0.564247	-0.118577	-0.125857	0.33177	0.77899	0.775578	1.72033	-0.152466	0.721557	-0.403262	0.656247	0.363834	0.0914218	0.0157387	0.664403
79	0.338678	0.104843	0.984743	0.516152	-0.568686	0.530485	-0.0613296	-0.0949299	0.385106	1.06115	0.828902	2.0141	-0.241127	0.766197	-0.126405	0.522527	0.416227	0.122312	0.175778	0.786575
80	0.501215	0.133499	1.15814	0.566544	-0.401348	0.478157	-0.01199	-0.079792	0.409962	1.2761	0.837392	2.30522	-0.364219	0.808014	0.0906508	0.461843	0.518383	0.21487	0.373838	0.936221
81	0.641286	0.123103	1.33092	0.600341	-0.240256	0.406402	0.0258657	-0.0979578	0.384264	1.37297	0.786005	2.55575	-0.504635	0.856418	0.226232	0.499614	0.675525	0.377839	0.591173	1.11732
82	0.755542	0.0816697	1.49284	0.632044	-0.11824	0.316627	0.049401	-0.162271	0.293446	1.30029	0.682932	2.72624	-0.651614	0.915589	0.283343	0.641389	0.87593	0.600658	0.806916	1.31232
83	0.841702	0.0216238	1.63495	0.673156	-0.0679167	0.213549	0.0540889	-0.273224	0.13695	1.02284	0.539196	2.79869	-0.818714	0.987411	0.274958	0.861391	1.09474	0.866179	1.0094	1.48161
84	0.901519	-0.0414321	1.75436	0.728934	-0.119558	0.104426	0.0326163	-0.415776	-0.0689	0.540031	0.354201	2.75943	-1.01454	1.0631	0.206614	1.09768	1.30434	1.15771	1.20569	1.5873
85	0.943802	-0.0898153	1.85999	0.797086	-0.29808	-0.00342747	-0.0238527	-0.563155	-0.293142	-0.101343	0.131373	2.5952	-1.20478	1.13513	0.0699261	1.25969	1.47953	1.45321	1.41542	1.61524
86	0.986078	-0.104651	1.97591	0.867573	-0.616396	-0.106685	-0.122481	-0.685737	-0.496813	-0.806423	-0.128543	2.30503	-1.30807	1.1874	-0.157729	1.24948	1.58378	1.72827	1.65999	1.52019
87	1.05351	-0.0675718	2.1373	0.922859	-1.06437	-0.210402	-0.264923	-0.760205	-0.64114	-1.44656	-0.438357	1.91586	-1.26621	1.20591	-0.460373	1.00854	1.58378	1.95007	1.94664	1.25971
88	1.17354	0.0357624	2.37697	0.938868	-1.5969	-0.329831	-0.444323	-0.774948	-0.694971	-1.88804	-0.810581	1.46999	-1.08125	1.18479	-0.76365	0.573187	1.45772	2.07499	2.22693	0.815218
89	1.36554	0.210857	2.70669	0.887764	-2.12826	-0.486153	-0.644602	-0.730685	-0.641439	-2.02972	-1.24104	1.03986	-0.793966	1.12029	-0.968683	0.0923686	1.22669	2.06443	2.42676	0.247617
90	1.62834	0.450647	3.10345	0.743317	-2.54048	-0.694468	-0.843103	-0.637734	-0.483819	-1.83732	-1.71351	0.663212	-0.501192	1.00717	-0.985136	-0.206576	0.932017	1.88352	2.42535	-0.339859
91	1.93225	0.735607	3.51063	0.488299	-2.70997	-0.946948	-1.01614	-0.511958	-0.247671	-1.35845	-2.23468	0.303443	-0.330326	0.851191	-0.808897	-0.144818	0.592372	1.50886	2.07096	-0.878116
92	2.22214	1.03868	3.85535	0.122446	-2.54869	-1.19973	-1.14465	-0.370712	0.0246083	-0.709143	-2.83435	-0.134653	-0.310313	0.654127	-0.625064	0.224477	0.199056	0.940111	1.29004	-1.31209
93	2.43243	1.3338	4.07109	-0.330901	-2.04466	-1.37424	-1.21646	-0.228788	0.287236	-0.036681	-3.54246	-0.731677	-0.322256	0.399878	-0.780262	0.587865	-0.279616	0.204762	0.131391	-1.60191
94	2.50786	1.60598	4.11204	-0.821806	-1.27999	-1.37717	-1.22465	-0.0933816	0.509009	0.526116	-4.35855	-1.45425	-0.200886	0.0753757	-1.45848	0.589835	-0.853197	-0.614854	-1.28332	-1.71204
95	2.42111	1.8611	3.95593	-1.27694	-0.410635	-1.13106	-1.16452	0.0415881	0.690672	0.901542	-5.14753	-2.1021	0.14289	-0.31593	-2.29491	0.129423	-1.42387	-1.37519	-2.74153	-1.54287
96	2.18054	2.13168	3.60424	-1.61127	0.388122	-0.598881	-1.03198	0.198925	0.87452	1.09327	-5.585	-2.3623	0.736401	-0.737761	-2.59122	-0.584464	-1.74774	-1.88068	-3.80522	-0.919035
97	1.82632	2.47206	3.0862	-1.74897	0.984809	0.209233	-0.82417	0.415225	1.13574	1.18747	-5.29231	-1.90486	1.64614	-1.13241	-1.85399	-1.20903	-1.52773	-1.90907	-3.8512	0.272636
98	1.41507	2.93652	2.45836	-1.64983	1.33246	1.24529	-0.542597	0.727711	1.54835	1.31655	-4.0687	-0.45763	2.98165	-1.38415	-0.0477776	-1.43153	-0.606687	-1.27888	-2.45488	1.87759
99	0.996714	3.54359	1.78637	-1.33263	1.46841	2.43759	-0.198965	1.14982	2.13645	1.58311	-2.1827	2.13131	4.67341	-1.27198	2.48443	-1.04577	0.881827	0.0450863	0.17737	3.42174
100	0.594811	4.24752	1.11569	-0.881301	1.47904	3.69992	0.179142	1.64722	2.84374	1.97899	0.226403	5.62621	6.27114	-0.820455	5.04275	0.0769739	2.56176	1.90339	3.13235	4.35118

## Sheet: Knee Axial Forces (N)
Stride (%)	Con 1	Con 2	Con 3	Con 4	Con 5	Con 6	Con 7	Con 8	Con 9	Con 10	TTA 1	TTA 2	TTA 3	TTA 4	TTA 5	TFA 1	TFA 2	TFA 3	TFA 4	TFA 5
0	-48.2641	-36.8535	-30.859	-49.1918	-39.6641	-26.6654	-41.8167	-26.2718	-34.0371	-14.403	57.845	-29.7695	13.0785	-0.2483	-1.81231	-41.584	-14.846	-9.9222	-29.0582	21.1804
1	-11.3605	16.3682	3.96902	-30.4366	15.6703	42.4417	-45.3293	57.1278	17.9972	98.8764	185.292	44.6042	103.456	78.1875	44.5046	93.8644	67.4913	19.0166	-7.83525	164.919
2	44.638	86.4633	59.1859	12.196	59.5328	206.774	-33.7074	140.29	80.9254	181.638	288.928	139.413	176.556	149.461	104.027	243.214	196.75	88.2202	139.197	316.368
3	110.916	151.233	115.99	68.8311	71.628	302.618	41.8064	215.444	128.454	222.757	392.109	199.297	252.561	226.404	164.861	383.439	322.9	172.955	317.074	418.132
4	155.542	215.659	157.839	126.063	110.38	420.878	108.391	308.672	194.75	323.997	464.783	256.044	328.894	310.821	237.426	502.322	419.534	263.634	453.975	458.207
5	222.121	310.576	204.949	212.914	189.453	520.997	137.784	390.342	321.531	445.552	524.411	337.433	394.07	389.54	305.832	560.685	477.331	336.635	540.411	471.595
6	298.865	429.3	286.383	338.448	292.703	574.991	186.594	460.442	454.261	533.862	571.772	445.607	443.18	441.033	376.852	616.978	520.917	397.024	581.582	488.082
7	348.454	537.597	399.042	452.179	402.372	631.885	253.445	526.902	551.375	604.335	610.744	562.723	473.404	459.547	455.995	674.328	568.67	449.593	628.97	521.787
8	391.173	631.25	507.794	555.851	522.04	678.135	300.244	590.306	624.174	682.838	648.266	678.48	490.491	452.941	543.85	740.524	631.283	499.145	694.497	590.966
9	425.247	730.77	612.744	619.848	618.874	708.451	344.9	638.705	639.908	743.809	688.263	783.879	501.539	439.875	621.437	790.24	703.807	553.235	767.08	704.673
10	441.449	800.873	669.021	664.119	653.208	721.985	391.662	674.164	637.55	796.056	727.807	859.384	511.657	432.033	679.848	819.039	747.248	601.63	840.519	727.803
11	458.43	833.914	668.077	708.643	697.342	727.169	429.977	703.366	661.531	846.752	766.015	906.735	537.733	433.242	717.783	838.045	779.459	632.307	893.523	753.961
12	485.789	856.763	670.109	759.686	767.702	730.179	467.712	720.733	694.114	875.308	805.828	937.744	565.702	443.19	736.857	843.887	792.357	642.085	918.374	765.081
13	513.281	872.131	689.333	806.714	837.996	728.246	501.06	728.578	713.804	894.262	837.892	961.76	583.544	461.566	751.558	837.565	791.277	637.042	931.779	758.722
14	533.046	880.819	720.345	837.309	914.411	715.23	529.936	726.391	726.369	909.237	853.901	980.138	598.28	482.632	774.354	819.016	782.02	626.42	946.901	735.743
15	543.497	887.571	753.83	848.092	1001.01	697.365	549.853	715.732	728.358	918.764	858.346	994.471	603.95	500.267	801.042	792.394	766.25	615.094	963.868	693.646
16	546.182	889.932	779.842	840.926	1083.49	679.301	556.889	699.189	723.516	919.568	845.761	1008.46	590.474	512.985	822.029	762.606	745.287	604.157	972.854	641.531
17	541.638	883.456	792.763	820.333	1144.1	658.484	554.528	677.568	717.873	907.091	818.446	1014.57	562.716	520.843	833.037	734.529	719.968	589.206	965.637	590.501
18	529.086	866.065	795.327	786.134	1178.83	632.556	546.011	652.907	707.833	880.574	781.41	1012.35	533.097	524.496	831.07	714.357	692.219	565.39	945.172	543.956
19	510.331	839.771	784.349	743.605	1198.12	605.996	533.571	626.496	695.858	845.247	738.087	1004.52	503.723	526.279	818.282	702.038	666.59	543.783	916.529	504.009
20	489.506	808.019	760.642	700.441	1205.57	582.833	516.534	598.735	679.558	809.312	692.403	992.969	474.778	525.686	795.633	695.93	645.911	530.603	884.989	472.123
21	469.049	774.723	728.83	660.226	1196.08	562.439	494.991	572.414	657.327	774.509	646.575	976.238	450.83	521.794	764.515	694.636	629.418	520.904	853.695	448.435
22	450.126	743.737	693.687	624.018	1170.77	547.842	471.248	550.873	633.737	738.887	602.717	955.639	432.594	513.631	731.144	696.804	618.378	516.613	826.712	433.382
23	433.43	715.874	658.859	592.45	1132.51	540.315	447.26	535.503	611.26	705.236	564.605	933.829	417.119	503.576	699.236	701.872	613.788	519.729	807.161	426.391
24	418.877	692.518	629.17	565.842	1085.6	537.829	423.484	525.366	592.703	678.488	534.501	912.792	407.201	493.21	671.449	709.892	612.531	520.595	792.191	427.444
25	406.127	674.588	603.484	546.051	1035.33	535.677	400	519.515	580.03	659.945	513.676	894.538	401.113	483.904	649.239	717.561	613.261	521.033	780.376	434.076
26	395.459	661.894	580.967	534.657	984.384	533.524	377.976	515.713	573.248	647.065	501.043	881.377	399.413	476.887	632.319	724.283	616.194	523.997	774.297	442.198
27	386.655	654.045	561.644	529.367	935.404	533.245	358.115	514.467	568.944	639.363	493.842	873.879	400.913	471.86	619.87	730.725	619.944	529.007	771.474	448.568
28	379.47	650.268	543.942	526.677	891.094	535.618	340.308	515.098	565.61	635.15	489.909	870.477	405.575	468.287	611.901	734.707	623.382	533.511	769.981	455.327
29	373.546	649.402	528.111	525.946	852.736	540.05	324.902	518.165	563.627	633.411	487.983	872.986	413.779	464.774	607.595	738.421	627.414	538.048	770.17	463.019
30	369.221	650.851	514.757	527.933	821.15	545.168	313.066	524.965	565.48	635.192	489.342	878.742	424.196	460.918	606.541	739.995	631.078	542.995	769.793	471.529
31	367.35	654.595	504.077	532.146	796.376	550.832	305.153	533.402	570.439	640.931	493.658	879.369	436.082	457.692	608.431	741.094	633.812	546.739	767.56	479.855
32	368.1	660.826	496.219	538.441	778.157	557.389	301.082	543.383	577.178	651.289	500.904	875.109	449.12	455.836	612.611	740.133	635.69	550.471	763.751	488.405
33	371.768	669.282	491.722	545.821	765.897	566.159	300.009	554.162	581.301	664.322	509.822	867.621	461.812	455.003	618.359	741.875	638.374	555.24	758.696	497.687
34	378.592	678.708	490.589	554.737	760.03	576.479	301.747	563.569	593.275	681.16	521.826	858.427	473.902	456.274	625.146	743.336	641.04	560.62	753.403	506.803
35	387.465	689.716	493.129	565.518	760.469	588.181	306.117	572.903	603.365	699.965	536.194	848.367	485.038	458.717	633.565	746.066	644.644	567.156	749.237	516.118
36	398.712	701.165	499.984	577.925	766.919	599.867	313.174	582.049	619.147	720.246	552.564	838.542	495.767	462.042	643.078	751.571	650.528	575.354	749.92	525.267
37	412.441	713.435	511.384	592.672	778.782	611.537	323.249	591.767	633.466	742.099	569.264	830.221	505.337	466.083	654.277	759.165	659.323	585.375	754.2	538.552
38	428.476	727.338	527.078	610.012	795.891	623.515	335.97	601.655	647.675	758.946	586.444	824.761	513.603	470.925	668.092	769.024	671.123	596.289	760.775	558.404
39	445.869	744.371	547.119	629.443	817.915	635.94	351.413	612.027	662.566	785.335	603.18	822.206	520.886	477.489	683.153	779.58	684.461	604.597	769.864	583.804
40	463.154	764.843	571.955	649.632	843.463	648.661	369.077	622.621	677.758	811.489	619.777	822.346	526.884	486.137	697.237	789.537	698.238	609.541	784.754	609.118
41	479.463	787.851	601.038	670.445	871.047	660.999	388.085	632.752	693.668	839.662	636.123	825.15	532.873	496.506	708.733	799.332	709.942	608.671	803.506	628.257
42	494.212	811.586	633.684	690.861	899.711	673.257	407.447	641.495	709.882	867.543	651.898	829.486	538.724	507.971	718.241	807.261	716.738	599.279	822.311	638.099
43	507.29	835.468	668.467	710.163	928.683	685.196	427.24	649.132	725.445	892.175	667.51	834.828	543.533	519.951	722.404	812.194	718.977	583.516	841.8	638.396
44	519.172	858.167	703.97	728.213	957.262	695.879	446.664	655.904	739.055	911.351	681.561	839.28	545.948	534.474	722.145	814.904	716.229	563.119	857.486	629.409
45	529.565	876.989	737.755	744.124	984.275	703.598	465.302	661.479	749.097	925.506	693.162	839.539	545.864	550.389	724.651	813.822	706.065	539.077	859.323	612.039
46	537.207	891.633	766.827	757.342	1007.82	708.009	482.539	665.096	755	935.213	700.281	834.131	542.311	564.44	724.399	807.007	688.001	511.249	847.388	586.361
47	541.422	902.531	789.066	767.738	1026.72	708.667	497.511	665.755	757.017	940.953	702.738	823.976	533.429	574.873	719.417	794.144	661.174	477.335	822.256	550.959
48	541.274	908.812	802.413	774.948	1041.11	704.297	509.687	662.551	754.251	941.565	700.068	808.899	516.903	579.652	710.396	774.875	625.874	435.055	786.418	507.148
49	535.733	909.221	805.915	778.354	1051.31	694.503	518.248	654.895	745.239	934.619	691.844	786.629	490.478	577.931	692.294	740.781	583.219	388.6	743.627	459.866
50	522.962	900.905	795.663	776.529	1056.27	678.03	522.262	642.934	728.602	915.577	678.232	756.329	450.721	569.04	662.8	697.141	534.31	340.932	692.708	406.46
51	501.382	880.719	767.541	767.88	1051.63	652.585	521.047	629.063	701.164	879.683	656.753	716.089	395.349	550.626	620.593	644.093	477.102	288.53	632.343	343.441
52	470.491	845.106	717.532	751.452	1034.43	613.41	513.034	599.407	656.392	822.622	629.252	663.26	326.438	523.053	565.749	581.675	412.811	236.156	558.665	274.746
53	428.48	793.167	643.271	723.819	1001.85	552.163	496.732	560.238	588.611	743.77	589.914	595.661	248.595	487.184	500.739	510.146	343.101	186.977	471.306	203.977
54	373.57	725.042	542.409	681.126	952.66	460.378	470.435	510.999	497.775	644.14	542.584	515.617	163.77	445.719	427.074	432.862	269.31	139.173	372.783	132.42
55	306.565	641.438	419.919	621.011	888.378	336.157	431.419	447.392	387.023	523.064	483.944	420.828	85.6052	399.995	346.283	353.137	197.041	91.4425	278.163	65.4213
56	229.624	541.189	292.709	541.486	808.839	197.107	378.113	369.255	267.844	389.708	413.89	318.836	18.1891	351.661	261.235	269.106	123.102	43.44	187.294	-7.43132
57	150.771	427.657	178.486	442.046	712.182	86.7045	310.751	282.695	162.011	266.198	333.532	209.611	-30.7921	301.734	173.729	182.002	62.2028	-6.1128	114.413	-41.4913
58	83.8405	310.405	85.7096	329.687	597.046	23.1527	232.384	200.034	82.0201	163.672	244.233	113.168	-37.6282	252.214	92.516	93.1546	19.9581	-24.9971	51.6292	-39.9541
59	32.4843	199.134	18.9343	224.706	463.034	-11.7643	154.704	126.759	21.7623	83.2989	151.585	31.851	-32.4125	203.461	30.7735	20.4497	-14.3624	-33.1049	-2.00609	-42.7883
60	-7.73212	102.992	-21.2129	133.351	313.346	-34.3523	91.1197	66.9262	-21.624	20.947	59.9217	-28.493	-25.3512	157.464	-15.5754	-27.5787	-35.3709	-33.5535	-35.5898	-44.7616
61	-36.8002	35.1082	-40.9421	55.8239	172.469	-52.5843	40.7061	21.5412	-59.8643	-24.7077	-7.80084	-70.835	-19.0491	116.561	-44.7178	-47.3485	-45.2259	-34.1115	-54.9098	-44.5338
62	-57.1919	-12.1534	-64.0604	-2.85709	65.6688	-62.561	2.70331	-18.4904	-70.1031	-49.6183	-42.7131	-86.4649	-14.1073	81.1668	-48.4881	-59.9577	-47.5867	-34.158	-54.6319	-41.5992
63	-63.6501	-43.9294	-66.9089	-36.9959	0.312847	-54.824	-21.3362	-39.5125	-65.5644	-58.7675	-36.9697	-71.3727	-10.9175	47.7784	-30.9712	-55.464	-43.9218	-33.72	-50.3412	-36.1621
64	-59.5033	-65.7277	-63.3009	-56.1221	-33.791	-45.625	-35.1233	-47.2294	-56.4959	-57.3948	-28.4145	-57.6117	-9.5748	18.8311	-16.2787	-49.9231	-39.5137	-32.7967	-46.4011	-28.9337
65	-51.6631	-64.9712	-56.0125	-59.6506	-51.7477	-35.6102	-48.8707	-50.2867	-44.2783	-47.6095	-21.3763	-46.6532	-9.89096	-6.04407	-6.0238	-44.3654	-34.8699	-31.5681	-42.8029	-20.7431
66	-42.1238	-52.1097	-46.4855	-51.1044	-64.9291	-26.5338	-47.836	-52.3936	-31.8366	-35.4979	-16.3041	-39.2541	-11.577	-14.6742	-0.8353	-39.5622	-30.3962	-30.0407	-39.6274	-12.3544
67	-32.709	-39.9212	-36.3049	-41.086	-65.3025	-19.3994	-41.7675	-43.2564	-21.9301	-24.7238	-12.9881	-34.6508	-14.3065	-19.5149	0.14986	-35.7993	-26.292	-27.9574	-36.8897	-4.52143
68	-24.7538	-30.0734	-27.423	-31.5508	-60.7074	-14.5998	-33.9294	-32.6235	-15.8078	-17.5456	-11.4293	-32.0589	-17.7464	-13.3318	-2.42908	-33.1723	-22.7293	-25.0068	-34.6005	1.86227
69	-18.9635	-23.828	-21.0378	-24.7806	-56.7428	-11.9964	-25.715	-23.2022	-13.2018	-14.4674	-11.3936	-30.9556	-21.5593	-9.56019	-7.9073	-31.6544	-19.9706	-21.0986	-32.8288	5.6995
70	-15.494	-20.9053	-17.3445	-21.4758	-51.8872	-11.1837	-18.7381	-17.0411	-13.3099	-14.7111	-12.6615	-30.7587	-25.3908	-7.7962	-15.2685	-31.1339	-18.3406	-16.5592	-31.6237	5.9545
71	-14.0956	-20.1725	-15.8277	-20.8157	-45.3756	-11.7841	-13.9667	-14.5884	-15.1511	-16.8934	-15.0603	-31.219	-28.9973	-8.02839	-23.6155	-31.3858	-18.1387	-12.09	-31.1383	2.05928
72	-14.1731	-20.4796	-15.6895	-21.45	-37.4125	-13.4804	-11.5857	-14.8951	-17.7953	-19.69	-18.4044	-32.5169	-32.2256	-9.8696	-32.3412	-32.1644	-19.5316	-8.59804	-31.5362	-5.82761
73	-14.9882	-21.1546	-16.1841	-22.1457	-29.2192	-15.825	-11.1636	-16.559	-20.4879	-22.2562	-22.4151	-34.6756	-35.0378	-12.8477	-40.8039	-33.161	-22.4177	-6.99677	-32.8077	-16.7052
74	-16.0053	-21.932	-16.7562	-22.3687	-22.3703	-18.3089	-12.0317	-18.4948	-22.8586	-24.2612	-26.806	-37.4148	-37.4871	-16.4938	-48.3804	-34.0576	-26.4407	-7.92156	-34.8462	-28.9374
75	-16.9003	-22.8392	-17.3069	-22.2596	-18.1591	-20.665	-13.5541	-20.2833	-24.9073	-25.9411	-31.2863	-40.5861	-39.7012	-20.3667	-54.7828	-34.6698	-31.1442	-11.5798	-37.564	-40.7632
76	-17.6543	-23.9929	-18.0088	-22.3808	-16.6716	-22.9609	-15.2671	-21.9349	-27.1286	-27.7973	-35.7068	-44.1884	-41.8846	-24.1559	-60.0961	-35.0461	-36.0807	-17.6741	-40.7692	-50.8336
77	-18.4882	-25.5751	-19.0318	-23.3819	-17.6869	-25.3908	-17.0238	-23.6104	-30.2943	-30.136	-40.014	-48.4537	-44.1852	-27.7647	-64.5899	-35.4503	-40.9013	-25.5392	-44.1963	-58.4193
78	-19.752	-27.7518	-20.4411	-25.6475	-20.6747	-28.0999	-18.9628	-25.7854	-34.72	-32.962	-44.1873	-53.5688	-46.4996	-31.2379	-68.4728	-36.1457	-45.3745	-34.1931	-47.7827	-63.3765
79	-21.7447	-30.6593	-22.4003	-29.2116	-24.516	-31.2885	-21.3356	-28.8325	-40.1396	-36.3643	-48.2106	-59.1975	-48.4978	-34.6273	-71.9302	-37.4381	-49.3913	-42.5484	-51.6083	-65.9705
80	-24.6394	-34.4266	-25.2273	-33.9901	-28.2574	-35.0897	-24.3168	-32.9643	-46.1672	-40.6455	-52.101	-64.8224	-49.8833	-37.982	-75.024	-39.6325	-52.865	-49.6703	-55.5476	-66.6098
81	-28.5357	-39.1088	-29.2332	-39.7536	-31.7941	-39.3757	-27.962	-38.2118	-52.536	-46.1989	-55.8474	-70.1671	-50.6045	-41.3662	-77.7053	-42.994	-55.7623	-54.9506	-59.4791	-65.6257
82	-33.456	-44.7854	-34.56	-46.4091	-35.7681	-44.0269	-32.2581	-44.4265	-58.9834	-53.3354	-59.4061	-75.2262	-50.6843	-44.8084	-79.775	-47.6192	-58.1352	-58.2216	-63.4216	-63.2787
83	-39.3974	-51.6158	-41.2439	-53.8096	-40.7864	-49.2063	-37.1566	-51.2633	-65.252	-62.2125	-62.6946	-79.8546	-50.1275	-48.1828	-80.8886	-53.4527	-60.0811	-59.7038	-67.3535	-59.8143
84	-46.3669	-59.5211	-49.1259	-61.6318	-47.3667	-55.1839	-42.5386	-58.1957	-70.7606	-72.5618	-65.5589	-83.5627	-48.8882	-51.2499	-80.6129	-60.2478	-61.6675	-59.8124	-71.1327	-55.4769
85	-54.1828	-68.1669	-57.7252	-69.2044	-56.7393	-61.8396	-48.2601	-64.4859	-75.0011	-83.6164	-67.726	-85.8452	-46.9011	-53.6576	-78.6499	-67.5361	-62.8316	-58.9703	-74.457	-50.3631
86	-62.4458	-77.2165	-66.2423	-75.7952	-69.894	-68.6148	-54.1797	-69.2701	-77.782	-94.3336	-68.8318	-86.36	-44.1605	-54.9098	-74.8729	-74.6212	-63.3906	-57.4642	-76.9255	-44.5515
87	-70.6383	-85.9239	-73.8179	-80.8016	-86.0887	-74.7119	-60.0746	-71.9686	-78.8282	-103.191	-68.4776	-85.049	-40.8045	-54.4798	-69.2998	-80.5179	-63.0973	-55.4575	-78.1575	-38.2564
88	-78.2475	-93.2623	-79.7176	-83.7613	-103.631	-79.3525	-65.4212	-72.5667	-77.7915	-108.486	-66.2162	-81.7771	-36.962	-52.0014	-61.9007	-84.1798	-61.7526	-53.0419	-77.8938	-31.8947
89	-84.629	-98.4166	-83.1905	-84.1532	-119.868	-81.79	-69.4741	-71.5213	-74.3754	-109.063	-61.6672	-76.4049	-32.698	-47.4059	-52.6644	-84.6616	-59.142	-50.1479	-75.7757	-25.9828
90	-88.901	-100.871	-83.6321	-81.6395	-132.11	-81.3646	-71.6713	-69.0106	-68.6705	-104.656	-54.6822	-69.104	-28.1493	-40.9641	-42.0136	-81.2534	-55.0605	-46.5563	-71.4719	-20.9602
91	-90.0387	-100.014	-80.7206	-76.1928	-138.304	-77.7247	-71.7744	-64.9963	-61.3247	-95.8115	-45.5472	-60.6349	-23.5707	-33.3238	-30.9816	-73.7643	-49.4801	-42.1526	-64.93	-17.0736
92	-87.3155	-95.4702	-74.4484	-68.2582	-137.162	-71.012	-69.8504	-59.7139	-53.4248	-83.861	-35.0045	-52.3687	-19.3241	-25.3799	-20.8921	-62.7859	-42.7204	-37.0619	-56.5474	-14.4864
93	-80.7257	-87.3914	-65.5066	-58.9509	-127.613	-62.0344	-66.2169	-53.6355	-46.18	-70.6118	-24.2663	-45.8547	-15.8276	-18.1353	-13.1089	-49.571	-35.4792	-31.7141	-47.2046	-13.4272
94	-71.2123	-76.6809	-55.3797	-49.8205	-110.372	-52.3583	-61.3443	-47.618	-40.6118	-58.0233	-14.8921	-42.6289	-13.5273	-12.6399	-8.97622	-36.0495	-28.8439	-26.8522	-38.1857	-14.2881
95	-60.6253	-65.0878	-46.1914	-42.3093	-88.5764	-43.9006	-55.8018	-42.4734	-37.4525	-47.9252	-8.56231	-43.7574	-12.9368	-9.88716	-9.60056	-24.7346	-24.189	-23.3418	-31.095	-17.5844
96	-51.2293	-54.9271	-39.8876	-37.5575	-67.2749	-38.5157	-50.2743	-39.1007	-37.2052	-41.7888	-6.81223	-49.3222	-14.5861	-10.6748	-15.4185	-17.9874	-22.8307	-21.9458	-27.6433	-23.7464
97	-45.0264	-48.3546	-37.2872	-36.1887	-48.6576	-37.496	-45.522	-38.1879	-39.8859	-40.4815	-10.6219	-58.1565	-18.7879	-15.3263	-25.8968	-17.5671	-25.7077	-23.1762	-29.2605	-32.8271
98	-43.1394	-46.6767	-37.9284	-38.1328	-39.3408	-40.9677	-42.2818	-39.9707	-44.8181	-43.9066	-20.4023	-68.0967	-25.3706	-23.3263	-39.41	-24.2838	-33.1164	-27.2752	-36.5946	-44.312
99	-44.9505	-49.2306	-41.4413	-42.4531	-40.505	-48.3243	-41.0346	-45.783	-51.1209	-52.4092	-33.1069	-76.1681	-33.3736	-33.0794	-53.259	-37.8001	-44.2148	-34.0186	-49.1025	-55.9382
100	-48.5828	-56.0363	-38.8731	-48.3014	-34.9877	-50.659	-41.9239	-28.291	-52.0844	-47.1554	-48.9613	-79.8144	-41.0868	-43.1253	-64.546	-56.1535	-57.5374	-42.404	-65.0003	-66.5918
